# Supplementary material for: Genome-wide identification of Phosphate Transporter gene family in Trichoderma harzianum and expression in response to biotic and abiotic stress
Source: Research Square preprint supplement (doi:10.21203/rs.3.rs-7983806/v1), 2025-11-12
Supplement: Supplementary file 1 [file 9229990bc761e39daabc9da9.xlsx]

## Sheet: Table S1
Table S1. List of all primers used in this study.
Primer names	Primer names	Sequence (5’-3’)
primers for RT-qPCR	TrPHT1-qRT-F	TGTCATCATCTTCGCTACCATC
	TrPHT1-qRT-R	CCGATACCGATGCCCATAATAA
	TrPHT2-qRT-F	ATATTCGCCCAACACGATCC
	TrPHT2-qRT-R	GGCAATCTCGTCCGTTCTATC
	TrPHT3-qRT-F	CCTCTTCTCTTCCAACGTCATC
	TrPHT3-qRT-R	GATGGACCCAAAGAGGGTAAAG
	TrPHT4-qRT-F	GTCTCCCGTCTCTTGGTATTTC
	TrPHT4-qRT-R	AGAGGAGACAGGTTACCGATAG
	TrPHT5-qRT-F	ACTACTGGAAGACCTTGATTGG
	TrPHT5-qRT-R	TCGACCACGGAAGAAAGAATAG
	TrPHT6-qRT-F	CCTGCTTATCTTCCGCTACTATG
	TrPHT6-qRT-R	GAGGATGGACGAGGTGTAGATA
	TrPHT7-qRT-F	GATCAACCGAAGACGGAAGAA
	TrPHT7-qRT-R	CAGCCTACCATCAGCATATCAA
	TrPHT8-qRT-F	GTGCTACCGGAACGTTTATCT
	TrPHT8-qRT-R	CAACTCCTCCTGGGACTTTATG
	TrPHT9-qRT-F	GTGGAAGTCGTACCTCATCTTC
	TrPHT9-qRT-R	TCAGTCTCTTCCAGGGTCTT
	TrPHT10-qRT-F	TGCTTCCGGGCTTCTTTATT
	TrPHT10-qRT-R	TGATGAGACCGCTGAGATAGA
	TrPHT11-qRT-F	GGTGTCTCTTCACTCCTGTATG
	TrPHT11-qRT-R	GGTGTCTCTTCACTCCTGTATG
	TrPHT12-qRT-F	GTCGTCGCAAGTCTCTCATT
	TrPHT12-qRT-R	GGTAGCCGATGGATCGTTAAG
	TrPHT13-qRT-F	ATCGTCTTCTGCCTCTTCATTC
	TrPHT13-qRT-R	ACCTCTCTGGCCTCTTCTT
	TrPHT14-qRT-F	CTGGAAGGAGACGTTGAAGAAG
	TrPHT14-qRT-R	AAGATCTCGGGAGCGTAGTAT
	TrPHT15-qRT-F	GCTGGCGATACTTCCTCATTA
	TrPHT15-qRT-R	GTACTTGGGCGACTCGTAAA
	TrPHT16-qRT-F	CTACCCAGATGACCTAACCAAC
	TrPHT16-qRT-R	GACAACGACACCGAAGAAGA
	TrPHT17-qRT-F	GCTCCTTTATTGGCTCTCTTCT
	TrPHT17-qRT-R	CAACGAGATGGGCGATATTCT
	TrPHT18-qRT-F	CCTACATGGTTGGTACCGATAAG
	TrPHT18-qRT-R	GGGATGAGGAAGTAGGAGTAGA
	TrPHT19-qRT-F	CAAACAGATCGCTGGAAGAGA
	TrPHT19-qRT-R	CACCTCTGCGTGAGAAAGATAG
	TrPHT20-qRT-F	CAGCTCATTCCTCCGTTCTT
	TrPHT20-qRT-R	CAGCAGCTTGTTCCTTCTTTC
	TrPHT21-qRT-F	CTTCTCCACTGCTCACATCAA
	TrPHT21-qRT-R	CGGCCAAACTTGTCAACTAAAT
	TrPHT22-qRT-F	CTCACGTTTCTTCCACCTACTC
	TrPHT22-qRT-R	AAGACCCTTGCCATCATTCC
	TrActin-F	ATGGTATGGGTCAGAAGGA
	TrActin-R	ATGTCAACACGAGCAATGG
primers for mutant generation	TrPHT1-up-F	CGCTGGGGCGAGCACGTG
	TrPHT1-up-R	CATTGATGTGTTGACCTCCGGTAAAAAAAAAGGGGGCT
	TrPHT1-Hyg-F	AGCCCCCTTTTTTTTTACCGGAGGTCAACACATCAATG
	TrPHT1-Hyg-R	ACTAGGGGTGGTTTTGCCACACATTGCGGACGTTT
	TrPHT1-down-F	AAACGTCCGCAATGTGTGGCAAAACCACCCCTAGT
	TrPHT1-down-R	CACTCGCCAGACCTTATTA
	TrPHT4-up-F	CTGCTGAGGAAAATCGGG
	TrPHT4-up-R	CATTGATGTGTTGACCTCCCCGAGAGGGGGAAGTCTC
	TrPHT4-Hyg-F	GAGACTTCCCCCTCTCGGGGAGGTCAACACATCAATG
	TrPHT4-Hyg-R	CCTAGGAGAAGTTCGTGTATACACATTGCGGACGTTT
	TrPHT4-down-F	AAACGTCCGCAATGTGTATACACGAACTTCTCCTAGG
	TrPHT4-down-R	AGTCGGCAACCCATCTT
	TrPHT22-up-F	GGAACAAAGCCTTCGTCT
	TrPHT22-up-R	CATTGATGTGTTGACCTCCTATGACGTTGGGGCTATTGT
	TrPHT22-Hyg-F	ACAATAGCCCCAACGTCATAGGAGGTCAACACATCAATG
	TrPHT22-Hyg-R	TCTATAAATGCTCCAATCAAACACATTGCGGACGTTT
	TrPHT22-down-F	AAACGTCCGCAATGTGTTTGATTGGAGCATTTATAGA
	TrPHT22-down-R	GCAGCTCATCTACGCACA
	TrPHT1-test-F	TGCCGGAACTGTCATTGG
	TrPHT1-test-R	CACCGAAGCCGATCAGG
	TrPHT4-test-F	TAGAACACCAAGAAGACGCATG
	TrPHT4-test-R	CATCTTCCAAGTTCTGTAGTAGAC
	TrPHT22-test-F	CGGCATCATCCCCAACTC
	TrPHT22-test-R	AAGAAGATGGCGGACAGA

## Sheet: Table S2
Table S2. Identification of TrPHTs in Trichoderma harzianum.
Query gene	Subject ID	Gene symbol	% Identity	Alignment length	E value	Bit score
PHO84	scaffold19.t163	TrPHT1	54.291	571	0	601
PHO84	scaffold8.t122	TrPHT2	48.561	556	0	528
PHO84	scaffold5.t36	TrPHT3	32.039	515	3.68e-66	225
PHO84	scaffold5.t53	TrPHT4	26.901	513	3.88e-35	139
PHO84	scaffold45.t4	TrPHT5	24.74	481	9.73e-18	84.3
PHO84	scaffold8.t253	TrPHT6	25.823	395	2.25e-16	80.1
PHO84	scaffold25.t86	TrPHT7	23.413	504	1.15e-14	74.7
PHO84	scaffold28.t45	TrPHT8	23.251	486	1.97e-13	71.2
PHO84	scaffold20.t99	TrPHT9	24.435	487	7.41e-11	63.2
PHO84	scaffold19.t127	TrPHT10	23.326	433	9.15e-10	59.7
PHO84	scaffold11.t134	TrPHT11	22.543	346	1.04e-08	56.2
PHO84	scaffold21.t57	TrPHT12	22.526	475	1.1e-08	56.2
PHO84	scaffold17.t95	TrPHT13	19.57	465	1.27e-08	55.8
PHO84	scaffold25.t40	TrPHT14	22.065	494	1.56e-08	55.5
PHO84	scaffold12.t56	TrPHT15	24.638	483	5.67e-08	53.9
PHO84	scaffold1.t345	TrPHT16	24.762	210	9.21e-08	53.1
PHO84	scaffold29.t34	TrPHT17	23.469	392	1.05e-06	49.3
PHO84	scaffold19.t159	TrPHT18	21.722	511	3.22e-06	48.1
PHO84	scaffold7.t42	TrPHT19	24	475	3.35e-06	48.1
PHO84	scaffold34.t32	TrPHT20	21.721	488	4.74e-06	47.8
PHO84	scaffold4.t13	TrPHT21	21.253	447	9.26e-06	46.6
PHO89	scaffold20.t19	TrPHT22	36.275	612	9.15e-113	347

## Sheet: Table S3
Table S3. The sequence information of TrPHT family members in Trichoderma harzianum.
Gene name	Sequence type	Sequence
TrPHT1	CDS	ATGGCGTTCGGTAAGACCGCCGGAGGCAACAGTGCCTACCACAACTACAACAATGATTTCCTCCACGTCCAGGATCTCAACGAGCGTCGTCGTCTGGCCCTCGCCGAGATCGACAAGGCTCCCTTTGGCTGGTACCATGTCCGCGCCATTGTCGTTGCCGGTGTTGGTTTCTTCACAGACTCATACGACATCTTCACTGCCTCCATGTTGACCGTTATGCTGGGTATCGTCTACTTCCCAGGAGTCGGCCAGATGCCCACCTCCTCCGACAGTGCCATCAAGCTCGCCACCTCTGCCGGAACTGTCATTGGACAGGTTGGATTTGGTATCGCTGCCGATTTGGTCGGTCGTAAGCGCATGTACGGTCTGGAACTTATTGTCATCATCTTCGCTACCATC…
	Protein	MAFGKTAGGNSAYHNYNNDFLHVQDLNERRRLALAEIDKAPFGWYHVRAIVVAGVGFFTDSYDIFTASMLTVMLGIVYFPGVGQMPTSSDSAIKLATSAGTVIGQVGFGIAADLVGRKRMYGLELIVIIFATIGQALTSGSPACDVIGLIIFWRVIMGIGIGGDYPLSSIITSEFASTKWRGAMMSAVFAMQGLGQFTAALIMLFVTLGFKGSLSSAATTATCTGVCQLAVDKMWRTLIGFGAVPACIALYYRLTIPETPRYTFDIARDVEQAGDDVKAYMTGKREGHPDEIARITANKAAQESLQVPKASFRDFCSHYGKLKNFLILFGTAGSWFCLDVAFYGLSLNNATILKVIGYSTKNNVDVYHFLYNTAVGNIVIVLAGAVPGYWVSVATIDTL…
	Promoter	ACGCACGGGTTGTCGTCTGAACCGCGTAGTGCAGCAGATCCGAACCGATTCCCTTTCCTCGGTATCGCATCTTGGTGGTCCAGGCGCGGATGATGCCTCGACCAACCGTGCTGGGCTGCACAACGTCCTTCTTCTTCTTGTTTATTTCCTCTCCCTCCAGCCTCAGCACAACAGTGCCGATGATGTTGTCACCATAGACGGCTGCGATGACGGTGTCTTGCTTGCCGTCAGGGCCAGTGATGAAGTCTTTCCATCGAAACTCCTCGGCTCGCTGAATATAACCTGACGTATAGAATCGAACGAACGACAGATACAGGATAATGGAACCACAAATCATTGTCATGAGGGTACCGACGCCTGCATGCTGGTATTGGTGGTATGCACCAGCACACATGGCGA…
TrPHT2	CDS	ATGCCTTCCTACATCGATGGCGAGATGCTGCCGCCGCCAGCAGCATCAATCCGTGGCCGCGACTACCACACGTATGGCGGCAACAATGCTTTTCACAACTTCTACAACGACTATTCACACATTACCGATCCCAATCTGCGGAGACGCCTGGCCTTGTCCGAGATTGACAAGGTCCCTTTTGGATTCTACCATGTCCGAGCCGTCCTGGTCGCCGGAGCTGGATTCTTTCTCGATTCCTACGACATCTTCGCCATCAACCTCATTACTACCCTCCTTGGGCTGGTCTTTTACAGCGGCGATAGCTCTCTCAATGGCTACGGGGGCAACGACGGAATTCTACCCGATCCTGTCAACCAAGCGCTCAAGGCCTCGACCAGCGGCGGCATTGTGCTGGGAATG…
	Protein	MPSYIDGEMLPPPAASIRGRDYHTYGGNNAFHNFYNDYSHITDPNLRRRLALSEIDKVPFGFYHVRAVLVAGAGFFLDSYDIFAINLITTLLGLVFYSGDSSLNGYGGNDGILPDPVNQALKASTSGGIVLGMIIFGWLADALGRRRMYGIELIIIIIGTFGCALASPSPTISAAGLLVFWRVMMGIGIGGDYPLSSVITSEFAPTRWRGAMMAAVFSMQGLGQLLAAIVALITTVAFKKHYIDISAEGACDLACREAADRSWRIIVGVGAIPAVLALYYRITIPETPRYTFDIQNDIEKADADIRAYVSSRPKGDFGSMKRSRSGTMTTEQPLDVPPASWPDVMTYFGQLKNFKVLVGTTMSWFFLDLAFYGLSLNNTMVLSAIGYATGRTLYHKLYN…
	Promoter	TGCGGATGGACGTTGAGATGATTCAGTTGGATAGCAAGGACGAGCCCTGGTTGCCGCTACGGAGAATACATGGGGGACCGGCGAGGACAGATGGGGGAAATTTGATAAGAAGCGGCCGTTTCGAGGTCAACAGCGGGAGAATCGTGGCCTCGTAGATGCCGTGTTAATGATGAGCCTCCCTCGTAATCATATAAAGAAGAATGTCGAGCCAGGCAACAGGCTGCTGGGATTCGCAATTTGGCGTTGGTGGGCTAGGAAACAACGGAAAGCAGAAGGATTCCGGTATAGACCGCATGTGCGAAAGACTGGTAGGCCGCTTTCAAGGCTGGACAATGCGTGCGCCGCAGCTTGGCGTAAGGCTGAAAGGATGAGCCGGGTGATTGCTTTTATCAAGGCGAT…
TrPHT3	CDS	ATGCCCTTGAATCTGGGGAACAGCTCCGGGCGGAGAAATCGAGGGTTTCTCGGCGCCGACAGCTCTGCCTTGTCGTCCCAAGACGTCCAGGATCGACATCAGTTGCGCTACGAGCTTGACCTCAACTCCTGGAACCTCCGCATCTGGGGCGTTGCCGCCTCGGGCTTCCTTACCGATTCATACAACCTCTTCTCTTCCAACGTCATCCTTGCTTCTGTTGCCTTTGTATATTGGCCTCACGGAGGAGAATGGACTAGCCTCCTCATCAACTTCTTTACCCTCTTTGGGTCCATCGTTGGACAGGTCCTCTTTGGCTACCTAGCCGATCGCTTTGGTCGTACCCGCCTCTATGGAATCGAGCTGGTTCTCGTCATCGTCTCTACCATTGGCGTAGCTACT…
	Protein	MPLNLGNSSGRRNRGFLGADSSALSSQDVQDRHQLRYELDLNSWNLRIWGVAASGFLTDSYNLFSSNVILASVAFVYWPHGGEWTSLLINFFTLFGSIVGQVLFGYLADRFGRTRLYGIELVLVIVSTIGVATSSHGYGDMSFLGLFIWWRFVMGIGIGAEYPLSAVITSEWSSTQSRSSMLASVFLMQPVGQALAQIIGLLVLIGFNNTHHLREMRCGLDSLHEEECRRAVDGIWRIVIGSGAVPALLAIIFRFFLFDCGLYSLEVKNKPAVAIMNTQRVYGAPSGTTTNNVQMNPPNGMHPENSPGPMPIQFSREDLHNYFIRDGNWYYLLGTSAAWFFLDVSFYGLSLDNRGTLADMWATTKPAKINSQLSCWNSSLLGGNSTVPGWVTAGLPAWQ…
	Promoter	TGGCCGCGAGACTCACTCGGGCGAATGCGCCCAAGCAGATAGTAGATACTTGGGCGGGGGGGTTGCAGCAGCTGGAGGTTTGTGTACTGCAGGTTGTTCTGAGACAGTCTCAATCTCTCTGTTTTCCCCCCTAATAGCTGTCGAGCGGGTTCAGTTGAGACACGGGGCCCGAGGGGAAAGAGGGAAAATGGCACGATTGTCGAGCGACAGGCAGAAATGGGCGCAACAATCCCAGCGTCTGGCTCATTACGGAAGACACGATTTGACGTTAGCATCTCATGGCGGGCCCATCAACTGGCGAAGGGGAGAGGAAGAAAAGGCGAGAAGGAGAAAGGAAGAGGGAAAAGAAAGAAGAAGAAAGGGAGCGCAAAGGAAGAAGAAACAGATGAAGTCTCGGCG…
TrPHT4	CDS	ATGGCCAGCCAGGAGCACCACCACCTCGGCGGCATAGTCCCCGGTGAAATCCCCATCCCCCACGGCCCCCATGAGGATGGCGACGACCGCGACGACTACCCTCTCGATGCGGATGAGCGCCGTGTTTTCAGCCATGTCACCCGTCCCGATGACAGCTACACTCCCGACGGCACCTACTGGGCCGACCTGCCCTTTGGCGAGCGTGTCAAGTTCGTCTCTGCCGTCGACCGACAGGCCGCCAGCGAGGAGCTGAGCACCATCTGGTCAATGATCAAGAAGGATCCTCTGTCTCCCGTCTCTTGGTATTTCCGCCATGCCGTCATTCCTGGTGCCGGTCTTGGTCTGGAAGGCTACGTTCTTTTCTCTATCGGTAACCTGTCTCCTCTCTTCAGCCAGGTC…
	Protein	MASQEHHHLGGIVPGEIPIPHGPHEDGDDRDDYPLDADERRVFSHVTRPDDSYTPDGTYWADLPFGERVKFVSAVDRQAASEELSTIWSMIKKDPLSPVSWYFRHAVIPGAGLGLEGYVLFSIGNLSPLFSQVWPECWGSKPTVCDPNWIAAVTYLEVVGIMIGQVIVGVIGDWIGRRWGLIQDAIIMFIGLLMLTASWGNSLQGWVICYAWSLFFYSLGVGGEYPITATSSLESAVTAGKLSTKEDRLHRGRRVTMAFLMQGWGQFVNQVLLIVLLVIFNHGKGGPPYTKEAAQFTFRLSFAFPAIGTLWLVYYRTWKMPNASKQLAEAKSRTSVTGYDVTALKSCFTHFGGRLLATAGTWFCNDVFFYGNKLFQGQFIKVISDNPNSLLTTWSWSLV…
	Promoter	TGTGATCGATACTAATGCACAAACGACTTATGCAGTGCACAGTAACAGAATAATCAGAAAATTATTCTGATCTGGTTTCCCACAAAGCAATCTGATTGGAGGAGGAGCCCAAGATTGCGGGGAGAAAGTCCGAGAATAAAGAGGGAGGGACAATGCCCTAGCAACAAATAAGGTTGGGGGGTTGCTTCGACCGCGGCCACCACACCAAGAGATGAAGATGGGGATGAAGAGAAGAGAAGAGGAAACGAGGGAAGAAAGATTGACGGGACGCAAATGCTTTATTTGTTTGTCGAAGTCGCAGTCGCCATGCGCTTTGTCACCCTTGATAGAGTGCATCAGCTTGGTTGCAAGCTAAAGACCCGCGAAAGGCAGTATTTTAGAAAGAATTTCAATATCCGC…
TrPHT5	CDS	ATGTCTGTCGAGCTTAGCCAGACGGAAAAGTCGAGCGCTGTGGTTGCGACTCAAGGAGATGGCGATGATGCTGTCGTCGCCGTTGAAAGTAGCGCGGCCAAGAAGCGCCAGTCGCTGTCTGACATCTTTACCATTATCGCGGCTGGTGCTGCTCTCATTTCCGATGGCTACCAGAACAACCTCATGACAATGTCCAACGTCCTCTTCAAGAAGGAGTATCCTGCGCAATACACTTCAACTGTCTCCACTCGCGTGTCAAATTCGTTACTTGTCGGTGCCATTCTCGGTCAAGTCTGCGTTGGTCTGACGTGCGACTATCTTGGACGCAAGACTGCAATCGTTGTAACAACGCTCCTCATCGTCATCGGCGGTATTCTGGCCACTGCCGCCCATGGAGTC…
	Protein	MSVELSQTEKSSAVVATQGDGDDAVVAVESSAAKKRQSLSDIFTIIAAGAALISDGYQNNLMTMSNVLFKKEYPAQYTSTVSTRVSNSLLVGAILGQVCVGLTCDYLGRKTAIVVTTLLIVIGGILATAAHGVTIDGMFWMLTVARGIVGFGVVTNLPLSFGGPLAVSIFLIVLSAAGENHLSTVWRVCFGIGILLPLSVFYFRLKMLNSKLYRKSAIQRNVPYGLAIRYYWKTLIGTCGAWFLYDFVTFPNGVFSGTILSSVVDPKDILRSTAEWQLLLGAIALPGVFLGAFLCDRLGRRNVMMLGFSGYLVFGLIIGCAYDKITKITPLFVIMYALMQSSGNLGPGDMLGLLSAESYATSVRGSYYGLSAAIGKTGAAIGVQAFTPIQNNLGKRWTF…
	Promoter	TATTCAATAATGCAGGATTGGTCCGCGGAGCAACCATCATGGAAGGGTCGTACGGGGATGTCGAGGCCACGGTGAAGACGAATCTCATTGCCCCGATGCTTCTTGCCAAGGAGTTTTTGCCAGAGATGGTTAAGAGGGACCACGGACATATCATACACACGGGCAGCTTGAGTTGTGTGACACCACCAGCCATGATTGCAGATTACGCCGCGACGAAGGCCGGGCTGTTAGCATTACACGAGGTTTGCTTGCTCGTAATCAGGTAGAAGTCTTGGACTAATATGCGTATTAGGCCCTTCAGTTGGAGCTCAAGAACATTCACAATGCACCTCGTGTACGGCTCACATTCGGCATGTTCTGCTTCATCCGCACAGCTCTCGTCAGCGGCCATACGAATGT…
TrPHT6	CDS	ATGATGGAGCCCGCCATTGAAGTCGGCGCCCGCCGCAAGACCTTCTTCCAGACGGCTCTGCCCGTCTTTGCTTGCGGTGCCGGTCTCTTCTCCGACGGCTACGTCAACAACGTCATCGGTTCCGTCAACACCGTTCTCAAGCTTCAGTACGGCGAGGTCTACACCTCGTCCAACGCCAGCAAGTATGTGTCGGACATTGCCTTTGTCGGCACCGTCGTTGGACAGCTGTTCTTTGGCTTCTTGGCCGATCGCTGGTCTCGTTCCAACTCGCTGCTCGTGTCTACCGTTATCCTGATTGTCTTTACTGCCCTGGCCACTGGCTCTTACTACCACGGCGATCCTGTTGGCATGTTCAACATGCTGACTGCTTGGCGATTCTTTGTCGGTATCGGCATTGGA…
	Protein	MMEPAIEVGARRKTFFQTALPVFACGAGLFSDGYVNNVIGSVNTVLKLQYGEVYTSSNASKYVSDIAFVGTVVGQLFFGFLADRWSRSNSLLVSTVILIVFTALATGSYYHGDPVGMFNMLTAWRFFVGIGIGGEYPAGSVGCAETSGELKSGTRNRWFILFTNTMIDWGFVIGAFVPYAVAAATHDHRLSTIWRTSLGIGVVFPLILFVLRLRLKEPEEFSKESMRHKTPYLLIFRYYGFRLLAVSIIWFLYDFSSYAFGIYTSSILAGIYSDSAPLTTVFGWNTVINLFYIPGTMIGAFVSDWIGPKYTLIIGVSLQAVVGYIMAGVYDQISKHIAGFAVVYGIFLSLGELGPGNNIGLLAAKTCATGVRGRYYGIAAAIGKIGAFVGTWVFPRIEA…
	Promoter	ACTCGCCGCTGTCAGTATCAAGTCCCGTCGTGTACGTGTATGGCAGCTCGTCCGATGGAAGGCGTCAAACTCGCTGATCTGGACAACAACTACTGTAGCAAAGTCCGCTGTATCAAAACTCGCGATAGCGCCACAACCTCTAACCAACAGCGCCCCCCACCCCTTCTGTAAAAGTCGGGATTAGCGCACTGCTGCAGGCCTGTTTAGCGCCCTCGTCGGTGCAACTAACCGCGGTTTGGTGCATGGCCGTCCCTGTCAACGACTCTCCCGGATAGTGCTGACAGGTCGGCCACTCCGAGTCAGTTCAGTTCAGTTCACGAAGGAAAAAAACACCACCTCGAGTTCTGCAACACCAACACCGACGTCTCATTCTATCCACGTGCATCGCCAGGTGTGCAC…
TrPHT7	CDS	ATGGATGCCAAGACTGCTCAGGTCGATGAAGTGGCTATTTCGCCAACCCTTGAGCCAACCAACGACTCCAACAAAGATGTTGTCGCTCAGCCAAGCACTCTATCGCGCGCCAGCCGCATCTCGTCGATCTTGATGGTCCTCGTCGGCGGCTTGGCCTTGTTCTCAGACGGTTACAATGCACAGGTCATCGGATACATGAATCCTCTCTTTGCAGAGCTGTATCCGGATGCATTCACCTCGACCATCAAGACCAGATTGTCCAACGCGTTTCTTATCGGTGAAGTGTTTGGCATGCTGTTCTTTGGCTGGGGAATCGACAAACTTGGTCGCCGGACTGGTATCTTCTTTGCAACTCTGTTTTTAATCTTGGGTATTATTCTGGCTACTGCGGCGCATGGC…
	Protein	MDAKTAQVDEVAISPTLEPTNDSNKDVVAQPSTLSRASRISSILMVLVGGLALFSDGYNAQVIGYMNPLFAELYPDAFTSTIKTRLSNAFLIGEVFGMLFFGWGIDKLGRRTGIFFATLFLILGIILATAAHGKTPTGMFWMMIVGRGVAGFGAGGEYPTCGTGSAEASDETAFVRRRRGMLVAVATDFAIDLGFVMAGVIVLIVLAAYHQHINDGVWRVSFGLGFILPVGLLFFRLRLINSSQYKKHAMKTHIPYWLVIKRYWRPMLGTSLAWFFYDFVTYPFGIFGSTIIGTLNPNNTLVQNIGYGTVLNCFYLPGTLIGGLLMDKIGRKQTMALGFFLWSILAFIIGGALNPITSIFPLFVVLYGIFNTLGEMGPGVGTFLCGAESFPTPVRGHFL…
	Promoter	AAACTAATTCTTTACGTAAATATTCTTCCAGAGCTAGCTAGATTATTTGTAAATTTTGTATCTAGAAAGCTAGCTGCCGGCCGGCATCAACGCTCAGCATCGGCGAACCGAACGCGTATCTCAAAGCTCCATCTTCATACGTCTCTCCCTTCTTACGCATGTGAGTGGCAGGCCACTCTTTCTTCCTCAGCTCGTAGTAATCCCTATGCAAATCGCCTTCACTCGCACGGTTATACGTAGCATAGAGCGCTTTGCGGTTCTCATTGCTGTGGTTAGGTCCACTGCGGTGAGCCAAGTATGAAGTAAAAATGAGCAGCTGGCCTGGTGAAAATGTCAGACAGTGCCCGATATAGGTAGGAAATCATCATTCATGGCTAGGCAATTGCACCTACCGGGCTC…
TrPHT8	CDS	ATGGCGCCCAATCCAACAGACGTCAGTGTGGTGCAGCAGCAGCCCACTAAAGGTGTTTTTCGCCAATTTCGTGAAAACCCGTACATCTTTGGTCTCTCGGCTTTTGCTTCGCTCGGTGGATTTCTCTTTGGCTATGACCAAGGCGTTGTCTCAGGTGTCCTGGGAATGGAGAATTTCGGTGCACTCTTCCCAAGGATCTATCTGGACAGTGGATTCAAAGGCTGGTTTGTCTCTACGCTGCTTCTGACAGCATGGTTTGGCTCCTTGATGAATGGTCCGATTGCGGATCGCTTTGGCAGAAAGGGCTCAATGATGGCCGCTGTTGTGGTTTTCCTTCTCGGATCCGCTCTGCAGTCTGGCGCAACCTCAATCGGCATGTTGTTTGGTGGGCGAGCTATT…
	Protein	MAPNPTDVSVVQQQPTKGVFRQFRENPYIFGLSAFASLGGFLFGYDQGVVSGVLGMENFGALFPRIYLDSGFKGWFVSTLLLTAWFGSLMNGPIADRFGRKGSMMAAVVVFLLGSALQSGATSIGMLFGGRAIAGLAVGMLTMIVPMYMSEVSTAGIRGTLVVLQQLSITLGILVSYWLEYGTQYIGGTRCAPDIPYSGGTPDKPTFDPRNDVGPNGCTGQSQAAWRVPFALQIVPALILGIGMIFYPESPRFYLMRKNEEAALRSLARLRRVHPDSESLREEYLSIKAEVMFDEAHSRENYPGKSGVSLFFSEYYGLLSTWPSFKRVFIGSAIMFLQQFQGCNALIYYAPTIFGQLGLSGNTTSLLATGVYGIVNTLSTLPALFLIDRVGRRPLLMCG…
	Promoter	CTTGAATTTGCGCTTTACAGCAGCTGTACCACAATAACCGCTGAATGAAACTGAGAATCCACAAAGATACTTCAAGATATCCGGCTCAGATCCCGCCAAAGAGCAGTGGATCAGCGTGCCTTTATATCTAATCCTCTTCCTTAATCCAACCTTGCTCCCTTCTCAAGACACAATATGGGTCCCTAGCTCTATGCTGACCGCACCCAGGGTGACTGTCGCCCTGAGACCCGGTACTGACTCTCCGCATTTCCCCCCTCTCCTCGTGCAAGCTACCGAAACTAGAGTGAAGCCAAGTTGTTGCGCCGAACAAGCCCTAAACCAACTTTTCGCGTTCCATGTGGGGAAGAGATCGTCGTCGAGTCCAATGGCGGGCTTTAAGATGGAGAATGCCACTGGAGA…
TrPHT9	CDS	ATGGCTATCGGCAACATCTACGTGATTGCCGGCGTGTCCGTCGTCGGCGGCGCGCTCTTCGGCTTCGACATTTCGTCTGTGTCGGCCCAGCTGGCCGAGCAGTCGTATCTCTGCTACTTCAACCAGGATGAGAACCCTCCAACCACAGCCGATGGCAAATGTGGTGGTCCGCGGTCTCTCGTCCAGGGAGGTATCACCGCCTCCATGGCTGCTGGCTCCTGGCTGGGAGCTCTGATTTCTGGTCCCCTGTCTGATCGACTGGGCCGAAAGTACTCCATCATGGTCGGATGTATCATCTGGGTCATTGGTTCCACTCTCTCCTGTGCCTCCCAAAACATTGGTATGCTCATTGTCGCCCGTATCATCAACGGTATCTCCGTCGGTATCGAATCTGCTCAG…
	Protein	MAIGNIYVIAGVSVVGGALFGFDISSVSAQLAEQSYLCYFNQDENPPTTADGKCGGPRSLVQGGITASMAAGSWLGALISGPLSDRLGRKYSIMVGCIIWVIGSTLSCASQNIGMLIVARIINGISVGIESAQVPVYIAEISPPSKRGRFIGMQQWAITWGILIMYYISYGCSFIGDDNPISYNTAAWRIPWGLQMIPAFFLFFMMMPLPESPRWLARKDRWEDCRAVLTLVHGKGDPNHPFVAYELQDIKDMCEFERQHADVTYLDLFKPRMINRTFIGLFTQIWSQLTGMNVMMYYIANIFSMAGYSGNANLLASSIQYIINVLMTIPALLWVDKWGRRPTLLIGSVLMALWMYANAGILATYGEVVPGGIDHVAAQSMRVTGAPAKGLIACTYLFV…
	Promoter	GGCTCACTCTTGATGCTTTGTGTAGAGGACCTTGACCATGAATCGTGGTGAACAGAGACGGGAGCAAAAAAAGAAGAAGAGGGGAGAGGAGAGAGGAAGGGGGAGGGCCTTATATATAGATATACGTAGGTCGCTCTCCGTTACGCCGGAATTGTGCGAGCAGCTGCCAGTGAATGCTGCGGGCAGCTGTCTGTGGCAGCTTCCCAGATTTGCCAGGTCCAGGCATGTGGTCCGTGGGCAGAGCACAACGAGACAGACGATCCATCCATTGAATGCTTTTCTCAGACCCCGGTCTCTAGCTTTTTTAGTGTGCTGGAAGCTTTCCTGGGATTCTCCATGGGCAAGCAGCAAGGCAGGAGAGTTGCTCGGGGCAAGCCACGGCCGGGGCTCCAGGATCGC…
TrPHT10	CDS	ATGTCAGACGACGGCCACGAAAAGGCGAAACTCGAGTCTCACGTAGACTTTGTTTCTACCGCGCCAGACCCACAAGATGTCAACGCCTTCATCGATGACATGGAGGGCCAGCTCGAGGCTTCCGGGGGTCTCAAGACGGGCTTCTTCCACGTGCAGTTCAGTGACCCGCGGCACTTTACATGGCTGCTCGTCGCCTTTGCCAGCATGGGCGGCCTGCTGTCTGGCCTGGACCAGAGCTTGATCTCCGGCGCCAATCTGTTCTTGCCCAAGGACTTGGACTTGAGGGAGAGGCAGAATAGTTTGGTGAATGCGGGTATGCCGTTGGGGGCTGTGGGAGGCGCCTTGTTGCTGTCGCCTGCGAATGAGTACTGTGGACGCAAGTGGGCGATTATTATCTCC…
	Protein	MSDDGHEKAKLESHVDFVSTAPDPQDVNAFIDDMEGQLEASGGLKTGFFHVQFSDPRHFTWLLVAFASMGGLLSGLDQSLISGANLFLPKDLDLRERQNSLVNAGMPLGAVGGALLLSPANEYCGRKWAIIISILLYTVGAALEAGSINFGMIVSGRVILGLGVGLEGGTVPVYVAETVERRIRGNLVSLYQFNIALGEVLGYAVAAIFLKVPGNWRYILGSSLLFSTIMFVGMLFLPESPRFLMHKNRILDSYKVWKRIRGTESPESREEFYIMANSVQQENTEVSEGAKNTRFPWMDFFTVPRARRALVYANIMILLGQLTGVNAIMYYMSVLMNQIGFDDEKATYMSLVGGGSLLIGTIPAIFLMETCGRRFWAIIMLPGFFIGLVLIGVAYQIPI…
	Promoter	TTTACATTTATTATTGCATCTGGGTGGCGTTTATTTTCCTCATTGTATACTTCTTCTTTGTCGAAACCTCGGGACCGACTTTGGAAGAGCTGGCATATCTTTTCGACGGGGACGAGAAGAAGAAGCAGCTCTCGGTCGAAACCCGATGGCAGAAAGACATGGAGATTCGCACGCAGACGGAATCGATAGGAGAGAAGTCGGTTTCCGGTGCGTCTGTATAAAAACAATTCGAAAACTGAATTGCATTGGGTATATTACGGCATACCGGCGAAACTGGACGCTGGAACATGTAACAAAAAAAAAGCATGATAGAATGGGTATTGGCGTTGGAATTGGAATTGGGCAGCATGGAGAATGCATTTTGCGATAGATACCATGGTCATTGAGCTTGAAATTAAC…
TrPHT11	CDS	ATGTCCACCGATTCCACGGATATTGAGATTGCTCCCAACGGCGTTGCTGCCGTGGAGCCGGCTCGACGTGTCCATGAGGCCCAGAAGACGATGTGGCAGTCTCTGCGGAACAACCCCAAGGTCCTCTTCATTGCCTTTTTTGCATCATTGGGTGGTTTCGAGTATGGTTACCAGCAGGGTGTCCTGGGCCAGTCACTGGTCATGACCCGTTTCAAGGAAAACTTCCCTGCGGTCGTCGGCTCGTCTTCAGCTACCGGCTGGCTGACATCGGTCCTCCAGCTGGGAGGTATCGTTGGTTCTCTGTCAGCCGGTGTCCTGGGCGAGATCATCTCCCGAAAGTACACCATGTTCATCGCCTGTCTCTGGGTCATCCTGGGTAGCTACCTCTACGTCGGTGCC…
	Protein	MSTDSTDIEIAPNGVAAVEPARRVHEAQKTMWQSLRNNPKVLFIAFFASLGGFEYGYQQGVLGQSLVMTRFKENFPAVVGSSSATGWLTSVLQLGGIVGSLSAGVLGEIISRKYTMFIACLWVILGSYLYVGAHEGVSSLLYAGRFFTGLGVGLFSGVGPLYNAELSAPEMRGLLVSFYQFATILGIMLSFWVGYCSNFIGGTGEGQTNLAWRLPSIIQGIPAVALAIGIWFMPFSPRWLVKVGRDEEAKKTMAWMRKLPVDDELVQIEYLEIKAESVFEKRVFERDLPKLASKKSNAFVEQFAQYAMCLNSKDNIKRVLTGFFIMFFQQWSGIDAIIYYATNIFITLGLTGGTTALLATGVTGVVFIVSTVPAMLIIDKVGRKPMLLVGSIVMAVSMV…
	Promoter	GTGCATGTCGGGGGTCTCGCGGCCCTTTTGGTAGAAGATGCTCTTGACGAAGTCCTCGGCCTGCGATTTGGACGTGCCAAGGCCCTCGGGCACGGGGGGAACCCATTTGTCCAGGCTGAGGACGGTGCTCTCTGCGCCGCCGGAGATGATGGCGCCGCACAGCTCCATGCGAGCGTAGCACCAGAAGACGGCCTGCAAGAGACCACCCGAGAAGCCAGTGACTTCGTAAAAGGCAAAGAGCGAAGCACAGCCCTCAATGTGTCGCCTCCAGTTGCGTGGACTGCCGGACATGAGCTCCAGCACGGCCAGGATGCACGCCGTGACGAGCATGTTGGGGTCCTTGGCCTGCAATCCGGGTGCCAGCAGCCGGATGCTCTCTTGGTACAGCTCGAGGCTGTC…
TrPHT12	CDS	ATGCGTTCTAGACGGGGCCGTTTTATGACCATCTACTTCGACCAGCATGACCCTGCGTCGGAGAAGCACAACCCCGACTTTGGTCGACCTTCAGTCTCTGGCCTGGACTATTCTCCTCTGCCACGTGTGACTGGACGGTCTTTCGCTATGGGTGTTTTGGTCTCAATGGGTGGACTGATCTTTGGCTACGATACTGGTCAGATCTCTGGCTTTCTGGAAATGCCCGATTTCCTGGACCGGTTCGGTCTCACTCACTCTGACGGCACAAAATACTTTAGCAATGTTCGCTCTGGTCTCATCGTCGCTCTTCTGTCCATTGGTACTCTTATCGGAGCCTTGGTAGCTGCACCCATCGCTGATCGCGTTGGTCGTAAGCCTTCCATTTCGCTGTGGGCTCTG…
	Protein	MRSRRGRFMTIYFDQHDPASEKHNPDFGRPSVSGLDYSPLPRVTGRSFAMGVLVSMGGLIFGYDTGQISGFLEMPDFLDRFGLTHSDGTKYFSNVRSGLIVALLSIGTLIGALVAAPIADRVGRKPSISLWALVVSVGFVIQIASITAWYQLMIGRFVSGLGVGALSLLVPMYQAETAPAWIRGAMVCAYQLFITMGIWLAACFNYGTVKHQSGNSGSWRIVIGLGWIWTLILGFGILLFPETPRYDFRHGHEERAKQTICRVFGATENHWAVHTQITEIERKLRAEDKIQLGPVKEFIGMFRAPRMAYRIALGMTLQMFQQLTGANYFFYYGTTIFKSVQINSFVTQIILNSINFGVTFIGLYMVEHFGRRKSLIAGSIWMFICFLIFASVGHFMLNL…
	Promoter	ATTGCGGGAGGTGGGATGGGAGGACGGATGGGGAGATGGGTGGTGATCTGGTGTTTATGCGTGATTGTTTTGTCAACTCTTGCATGACAAGATGGACCGTGACAGCGAAGAAGCGCCGCTGAATCAGCACCAGACGGATGAGATTTGCATATGCATACACAGAAAAGGGTCATGGGGACTATGCAGATTCCGAGCAACCGCGTTCTGTGGACGGGAAAGGACCGAAAGCAAGACATCTGCTGACTCGGAGCTTTTTCTTCTTCTGCTTCTTCCATTTCCTTTTTTTTTCTCTCTTCTTTTTTCTTCCCGCTGGATTATGTTATACGGGCCCCCGTGGATCCTTCTCCAGGCTTCTCTTGTCATGCCTTTGTCAGTGTCAGTCGACCCCAGCAGGGCAAA…
TrPHT13	CDS	ATGAAGAAATATTTCGGCCTCAGAGGCCAAGCCCTCAACTGGGCCATCGGCTGCATTGCTGGCTGTGACTTTTTGCTTTTTGGCTATGATCAGGGTGTCATGGGTGGTATCCTGACTCTCCCCATCTTCCTTAACCAGTTCCCCATCATCAACCCGGGAGCCGCTATTGACGACGCTGATGCGTCCAAACGCTCCACCTACCAGGGCATTGCTGTAGCATCTTACAACCTGGGATGCTTCATCGGTGCCATTATCACCATCTTCATCGGTAATCCTCTCGGTCGTCGGCGCATGATTTTCCTCGGTACTTCCATCATGGTCATTGGTGCTGCACTACAAGCTTCCGCTTTCAAACTGGAGCACTTCATCATTGGTCGTATCATAACAGGTCTGGGTAAT…
	Protein	MKKYFGLRGQALNWAIGCIAGCDFLLFGYDQGVMGGILTLPIFLNQFPIINPGAAIDDADASKRSTYQGIAVASYNLGCFIGAIITIFIGNPLGRRRMIFLGTSIMVIGAALQASAFKLEHFIIGRIITGLGNGGNTSTVPMWQSETCSAHKRGKLVMIEGALITGGIMISYWIDLGLSFAPGSVAWRFPLAFQIVFCLFILAFVLGLPESPRWLILKGREEEAREVIAAIADVDLRDKHVENEFQAIKETALEMSKGTYGELFANDHNRTLHRTIIAYVNQMFQQISGINLITYYAAKIYSDLGMSPFMSRLLAALNGTEYFIASWPAVFLVERVGRRKLMLFGAIGQAATMAILAGVNSRPTEKPFQIAGIVFLFVFNTFFAVGWLGMTWLYPAEIT…
	Promoter	CCCAGGTTTCGCATTGTCATGTGTGCCTCGGATCGCTTCTTTGGGTATTTCCAGAGGGAAGAAAGGGGGCCGGGATAGCTTCAATGTAGGGCGTCTGGGGAAACCTGGGGAGTTCTTTTCTGGGGGAGCACGCGAGATGAGAAAGAGGAAGATTTTAGGACGGCGGGGAAAAAAGAAGAGTCGAGACTGATGCGATGGACCCTCCCCCAGATTCTGCAATATTTCTCATCGTGACACAGACCCAAAGCGGCTTCAGATGCAGTTTGATACAGCCGTCGAGCATGAGCATCCAGAGAAGATCGCGAGGTGATCTAGAAAGCGTCGAAGCACGTTGATTGACGGCCGGCACACACGAATTCTGCACACCACATCAAAACAAGGCGGCGTGATTTCGAAAAC…
TrPHT14	CDS	ATGAAGTTCTTTAAGAATTATCGCGTGTATATCCTCACGTCGGTGGCCTACCTGGGCTCACTGCTCTTTGGCTATGATACGGGTGTCATGGGCAGCGTGCTCGCGCTCAAGAGCTTCAAATCAGACTTTGGCCTGCCCACAGACTCGAGCGGCTTCGCGTCGGCCGAAAACGCTCATGTATCCTCCAACGTCGTGTCCCTGCTCACGGCCGGCTGCTTCTTCGGCGCCATCACGGCCGCTTTCCTCAACGAACGCTTCGGCCGACGTTACTCGCTCATGCTCTTCACCGTCATCTTCCTCGTTGGCGCGGCCGTCCAGACGAGCGCGAGCCACACCATTGGCCAGATCTACGGCGGCCGTGTCATTGCTGGCTTCGGCATCGGCGGCATGTCCGCCATC…
	Protein	MKFFKNYRVYILTSVAYLGSLLFGYDTGVMGSVLALKSFKSDFGLPTDSSGFASAENAHVSSNVVSLLTAGCFFGAITAAFLNERFGRRYSLMLFTVIFLVGAAVQTSASHTIGQIYGGRVIAGFGIGGMSAITPVFVSENCPPAIRGRVAGLFQEFLVIGSTFAYWLDYGVSLHIKQSTKQWRVPVGLQLVPGGLMLCGLFFLKESPRWLMKKQRHEEALRSLAYIRNEAADNIEVQKEMAEIRASIEEEMALTEGVTWKETLKKGNWNRFALAFGIMFWQQFSGTNSIGYYAPEIFETVGVSSTNSSLFATGVYGTVKVVATAIFLFIGIDKWGRKRSLIGGAIWMATMMFIIGAVLATHPPDPKSSTVSSASIAMVVMIYLYVIGYSFSWGPTPWV…
	Promoter	AGGCTCTCAACCAGTTTCTACATCACAGCCTAACTTATATCAACTCTAGTGTTAATCAACAATTCCGACATGTAGAGTACTTCTGAGCCTCTCGCCATTATTGCACTTAGGAGTAACCATCTTTCGGAGTTCAATTGCCAAGGCCCTAGGACATGTAGTGTGCATGTAGTACTGAAGCTAGCAGCCCACCACATCCCGCGCCGATTAATTTCTTGGAGATGCTGCGCCAAGTCTCTGCCGAGTTCCTTTCCGTGATCTGTGCCTCGTGGTAGCGCCAAAGCCACAAATGAGGCACAATGGAGAATGCAAGGGGCGAATAGAATATTCCTCAACGTCACGATTTGATATGACAAACACTCTGTATGAAGGAAGAATTATTGTCCAAGGCCAGTTAAGCCA…
TrPHT15	CDS	ATGGGTTCCCCGTCAGACGACGGCAAGACGGCGCCGACCCGAGATGCCGTCGAGACTCAGAGCATTTCCACTGGCAGTGATGAAGATGTCATTCCCAAGGGTGCCCTCGATCCTGTATACGAGGCAAAGGCCAAAGTGCTGAATCACGCTATTCAAGACATTGGCATGGGATGGTATCAATGGCAGCTCTTCTTCGTCGTCGGCTTTGGTTGGGCTTCCGATAACCTCTGGCCAATCGTCACATCCCTCATCTTTACACCCATCAACAATGAGTTTTCCCCCAACCGCCCGCCGCTCCTGACTCTGGCCCAAAACATTGGTCTTTTGGCCGGTGCCGTCTTCTGGGGCTTCGGATGCGACATCTTCGGTCGGAAAATCGCCTTCAACTTCACTCTCGGC…
	Protein	MGSPSDDGKTAPTRDAVETQSISTGSDEDVIPKGALDPVYEAKAKVLNHAIQDIGMGWYQWQLFFVVGFGWASDNLWPIVTSLIFTPINNEFSPNRPPLLTLAQNIGLLAGAVFWGFGCDIFGRKIAFNFTLGLTALWGMVAAGAPNFAAIGIFDCFWSFGVGGNLPVDSAIFLEFLPATHQYLLTILSVDWAIAQVVANLIAWPLLGNLTCAQDEKPCLKHNNMGWRYFLITMGGITLLMFLARFLLFSLYESPKYLMGKGLDEEAVRVVHEVAKRNGKTSSLTIEDLKACEPEGYVFQADISTAVKRTLVQKIDTTHVKALFSTFKLGLSTSLIAAIWALIGLGFPLYNAFLPFIQANKGVDFGDGSTYLTYRNSLIIAVLGVPGALIGGLLVELPR…
	Promoter	GCAGCGCCGAGACGGGCCGTCAGCACGTATGGAGTACAGGTACATGTATGTAGAGAGAAGAGTCAGTAGACTGATGTTCGCTGTCTAATAATCATGGGCTCTTCTTGATACGGCCAGCATGGAGTGTTGTCGTGGATTGAGCTGGTTGCCAAATGAGGCTGTCACGTATGACCGTGGCGTTGTTTCTCGCTACGAGATCAAGGCTCAGGACCATCATGAGCTGATTACTCCTGGTAGAGAATGGCTGGTACTCGTATTGACAGGGAGTTACATGAAATATTAAAAATTCAAGACTGACGGGTGGAGCAAGTCCGGATGCTTTCCACACCAATCCATTTCTCGAATATGGTCCATCGATGTTGCTCTTGGTGTGTATCCACCACTCCAGATGCGACCTGC…
TrPHT16	CDS	ATGACTGCTGGAATAGGGGAGACGGAGGCTCCCAAGCCAGAAAATACAATCTCTGACTCCAAGATTGAAACTGTTGGCGAGCCAGTAGCCGCAGAGATCACTCGAGATGAGGAGCTACCAGAAAAAAGCAAAGAAAACGTCGATGTTGAAGCGGGGAGCATAGCAGAGTCGGTCAAGGGATACTACAGCAAGCTCTCGGTCTGGTTGATGGTTCTCTTCTCAGGTCTGGCCATTGGATCTGATGGCTACAATGCCGCTGTCATAGGCAACGTCGAGCTTCTCCTCGGCGCCATCTACCCAGATGACCTAACCAACTCCATCTACTCGCGCCTCAGCAACGCCTTTCTCATCGGCATGATCATCGGCATGCTCTTCTTCGGTGTCGTTGTCGATCAACTT…
	Protein	MTAGIGETEAPKPENTISDSKIETVGEPVAAEITRDEELPEKSKENVDVEAGSIAESVKGYYSKLSVWLMVLFSGLAIGSDGYNAAVIGNVELLLGAIYPDDLTNSIYSRLSNAFLIGMIIGMLFFGVVVDQLGRKTGAVATTILLVLGIAMSAAANGTSPKGLFWMLIIARGVAGVGAGGEYPVSGAGAVEATDESGQYRKHRGFMFAMLADLSSDLGYVWGGLVPLLLLLCVGQREDKYYIVWRTSFALGAIPPLGIFWFRMRMAVATAYRKSAMRKQRVPYWLALKRYYRPLIGAAASWFLYNWISIPFGIFSSTIISRANVGQSLVKNLGWGVLINCFYIPGPFLGGYLSDRIGRRQTMALGFAMQAILGFILGGAIGPIQTVFPLFVVLYGIFL…
	Promoter	GATGGTGGTCGTTGATTAATATTGGCACATCAGATCCTTCAGCTTCACGTAGATTTATCTCGATCTATGCGCACGGGAGCACAACTTACACGAAGAGGGGTTGCGGAGGAGGGAGGCTGCATGTAGGGTTACATTTACATGCGCCGTCCTCTCTCCTCCTTTTTGCATTCTTCTCTCGCAGACATTATCTTGCGGCACATACAGGCCACTTGCCTTCGGACGCTATCCGGTTAATCAACGAAGAGATCGGCATAAGACACGACTGCTTGCCTGTCAGATAACGCTCTCAAACTGACATTCTCCGTGTCTGGTGGTGATAACTAGGAGAACTAGCGTGGCCAAGGCGACCCGTCCGTTTCTGACGGTTCAGCTCTTTTACAGTACATGAAGACTTCATAT…
TrPHT17	CDS	ATGATCTTCGGCTTCGAGATCAGCTCCATGAGTGCGTGGATTGGTTCAGAACAATATCTCGAATATTTTAACCACCCAAACTCATCTGAGCAAGGTGGTATCACAGCTTCCATGTCTGCTGGCTCCTTTATTGGCTCTCTTCTATCTGGGTGGCTCGCTGACCGTATTGGCCGCCGGTTGGCTATCCAAATTGCGTCTGTGGACTGGATTATCGGCGCTGCTCTGCAGTGCTCTGCTCAGAATATCGCCCATCTCGTTGTGGGTCGCATTGTTAGTGGGCTTGCCATTGGTATAACAAGCTCTCAGTGTATCGTCTATCTCGCGGAACTGGCGCCCTCTCGTTCTCGTGGCCGAATTGTTGGTATTCAACAATGGTCCATAGATTGGGGGATTCTGATT…
	Protein	MIFGFEISSMSAWIGSEQYLEYFNHPNSSEQGGITASMSAGSFIGSLLSGWLADRIGRRLAIQIASVDWIIGAALQCSAQNIAHLVVGRIVSGLAIGITSSQCIVYLAELAPSRSRGRIVGIQQWSIDWGILIMYLISYGCSVSIHRPAAFRIAWGLQAVPGAVLFTSLFFFPESPRWLASKDRWEECHDVLANLHAKGDRDNIEVLAELEEVREAARIAAESKEIGYLGLFAPKMWKRTVIGVSAQVWQQLLGGNVMLYYLVYIFNMAGMSGNAALTSSIIQYVIFLVTTGGVLFVIDRMGRRWLFIVGALICGVIHFVVGAIMAVYGHHVDSVDGVTWAPGAWIYCGEVFPLKYRAKGVGLAAAGNWA
	Promoter	TACTGCTTTTCTCGATACCCTGGAAGTCATGATGGCGATGAAAGCAGCTGGGATGAGCTACAGAATGAAGCAAATGCTTGGAAAGACTCATTGCCGGAGTCATTTGATCCTGTATATGTTATAGAAGATGGCGAGGGGTTTCCAGAAATATTGTACCTTTGTACTTGGCATAGTGAGCCATACTCTCGCCGATATGCAGTTTCTTGTGGCTGATATCTTTCAGTTGCGGCGATGCAGTTCTATCACCTAGTAAAGGTGCTTCTCGCCCTACATAATCCACACCGTCCAAGCGGCATTGGGTTTCTACAGTTTGCAAGAGCTGTCGAAGTAAGTTAATTTTCAATCATATCAGCTTAAAATGTTTGCAATTCAAATTGCTTTCTAACACGGAGAAGGGTG…
TrPHT18	CDS	ATGTCCGACGCCCCCGAAACCAACGCGGAGGCGCGAAAGCACTCCATCGGCATCCACACTACCCAGGATGTCGAGCACATCGAGGCTCCCATCACATGGAAGGCCTACCTCATGTGCGCCTTTGCCTCCTTTGGTGGTATCTTCTTCGGCTACGACTCCGGTTACATCAACGGTGTCAACGGCTCCGCCATCTTCTACAAGGCCGTTGAGGGCGCTGCCGCTACCAAGCTCACCGACCCCCATTCCTCCCTCATCACCTCCATTCTGTCTTGCGGTACCTTCTTCGGTGCTCTGATTGCTGGTGACGTCTCCGACTGGATCGGCCGAAAGTGGACCGTCATCATCGGCTGCTTCATCTACATGATCGGTGTCATTGTCCAGATGGTTACTTCTCCCGAG…
	Protein	MSDAPETNAEARKHSIGIHTTQDVEHIEAPITWKAYLMCAFASFGGIFFGYDSGYINGVNGSAIFYKAVEGAAATKLTDPHSSLITSILSCGTFFGALIAGDVSDWIGRKWTVIIGCFIYMIGVIVQMVTSPEHALGPIVAGRLIAGLGVGFESAIVILYMSEICPRKVRGALVAGYQFCITIGILLASCVVYGTKDFTNTGAYRIPIAIQFPWALILGGGLLFLPDSPRYFVKKGEIQKAINSLSRVRGQPEDSEYVQNELAEIIANEEYERALIPNTTWFGSWANCFKGSLWTGKSNLRRTILGTSLQMMQQWTGVNFIFYYSTPFLQSTGAISNSFLISLIFSLVNVCSTPLSFWTVERFGRRSILIIGAGGMLICQFLVAIIGVTVGFNKTHPDP…
	Promoter	GGCGTCGAAGATTGGCTTGTTGGGGATTGGAATCTTCTCAGTTCTTGGTGTTGTTGAAGAGGAATGGGAAGAAGAAGGAGATGACCCGGGCCGAGTGAACGGAACGAGCTCTTATTGAGTGAGACAGAGATCGACGAGGCAAGACAGGAGAAGGAGGGAAGGGGCAGGAGGCAGGCCGGCCTTTTTATTGTCGTGACGGTCAGAGAGTTTCCGTCAGTCAGTCACAAGCAGGCAGGCAGAACCTAGAGCCCAGAAGAGGCGGCGGCATCGTCCAAGAGACTCCATGGTGGAGAGGCGCCGTCGATTTGGGGAAACTTGGGCGTTGAGAGAAGCTTCTTCGCACGCCCCTCCAGGTTCTGGATTTGCAGTGACCGGGGGGGGAGGGGGTGAGAGATTGGC…
TrPHT19	CDS	ATGGCGCCTCCTACGTTTGCTGGCCTTTCGGGGCGGCCTCTCTCCCTGGCCGTCTCAACCATCGCTACCACTGCTTTCCTTCTCTTTGGCTATGACCAGGGTGTGATGAGCGGTATCATTTCCTCCCCGGTATTCAACGACTATTTCCCCGCCACTAGAGATTCTACCATGCAGGGTCTGGTCACAGCCATCTACGAGATTGGCTGTTTGATAGGCGCTGTTTTCATCCTTGCGGTTGGAGACCTGCTCGGTCGTCGCCGTGCCATTATCCTCGGTGGTATCATCATGATTTTTGGAACCATTATTCAAGTCACACCCATGCGCGGTCATGCCCAGCTGGCGCAGTTCATCATTGGCCGCATCGTCACGGGCGTTGGAAACGGCATCAACACCTCAACT…
	Protein	MAPPTFAGLSGRPLSLAVSTIATTAFLLFGYDQGVMSGIISSPVFNDYFPATRDSTMQGLVTAIYEIGCLIGAVFILAVGDLLGRRRAIILGGIIMIFGTIIQVTPMRGHAQLAQFIIGRIVTGVGNGINTSTVPTYQAECSKTSNRGLLICIEGGIIAFGSLIAYWIDYGASYGPDDLVWRFPIAFQITFALLFSTAMIWLPDSPRWLLTHERYEEAERTIAALRGYEVDSEETKTERDIILDSIRASGFAGQKSTPVKALFTNGKTQHFRRMLLGASSQFMQQVGGCNAVIYYFPILFQNSIGESHNMAMLLGGVNMIVYSAFATVSWFIIERVGRRKLFLWGTAGQMLSMVLTFACLIPGNPSAAKGAAVGLFTYIASFGATWLPLPWLYPAEISP…
	Promoter	GATGGATTATCTCAAGACATACAACATATGCTATGTCTACGGTATAATACAGCGCAGGCGTTTATGCTCGGCTTGAATAATGGGGAATCGAAACCTGGAGGAAACATGGGGTTGAGCATGGTGTTATATATACCCATGTATACAATTTGATATACTGGACAATACTTGGTTTGAGCCCTCTGAGACTGGCTTGAGTCGGTCAAGAATCTTGATGTGTTCAAAACGGCGTGTTATCCACATGACATCATAATCGTCCGAAACAACTGGATCGTCGTGTTGAAGCAGATTGCAAAGAGTCCTAGTCCGAGGCACGAGAATTCACAAGGTGGGTCAGAGTGACGATCGAGCGGAGCCGCAGACAGAGGTTGTGTGAGTTGCAGCGGCCAACGAGATGTGCTC…
TrPHT20	CDS	ATGGCGGAGAAGGACGAGTCGCGGCCAGAGCCGGTCATCGACCATGGCTCGATCAATGGCGATCACATTGACAAGTCAGCCATTGGAAACGTCACCGAAGTCCAGGGCAACACACACTTCCACGAGACGGTCTCTGCGGCGCCTCTGAATCCCTGGTCATGGACGAGCATTCAGCTCTACTGTATCCTCCTCGTGGCGGCGTTGAACGCGACATCATCTGGTTTCGATGGTTCCATCTTCAGTTCTATCAACGCCATGACTCAATACCAGAACTACTTTCATCACACGGAGCTCGGCTCTTCTACTGGAATCATCTTCATGATTTACACCATCGGTAACATGATCGGCTCTCTCTTCACCGGTCTCATTTGCGACCAGTTTGGCCGTCGCGCGGGTATG…
	Protein	MAEKDESRPEPVIDHGSINGDHIDKSAIGNVTEVQGNTHFHETVSAAPLNPWSWTSIQLYCILLVAALNATSSGFDGSIFSSINAMTQYQNYFHHTELGSSTGIIFMIYTIGNMIGSLFTGLICDQFGRRAGMMTGSLFIMVGAIVQTAAKSDAYLLGGRFTLGFGVAIGTSSAPTYALELAPPQWRARVVGYYNTFFYTGSILATGVTYASAKNNSELAFRLPMGLQLIPPFFIFIGALLIPESPRWLTATGKKEQAAAILAKYHGGGDTNHPVVQLELREFEDSIELQKASNLWDYWALVKDHNARWRFTMMSFMSFFAQLSGNSVLTYYLPSMYKILGIISVERRLLLSFANSIVSATGAVAGSATNDKIGRRTKLWVGSIVLAGLFGAVTGFSAK…
	Promoter	GCGTCGGCCGCGTGCGGGGAACCCGCAGGGAGGACTCAAAATAGCAGCCGGAGTAATACCCGTCTTTCATAGCAGAGATGAAGCTCTGTGAAGGGCGTCATGAGCTTCTAGTTTCTCGTCCCGGATCCTCCATAGCTCTATGTGGAGCTCCAAGGTAACATCTGCTGCAGCTAGCACCATATCAATGAATTTCTCCAGGACTTGTGTACAATACTTGACAGCTCTAGAGATAGGTATTGAGGATCTCGCTTTGCTGGCCCGAGGCGGGACCCCCTACCTCTTCTCCCAAGCTCTTTTGGGGACCCATACGGGCTTCCGTGGGGGGACGAGCCTACGCCAGGCCTCGCCGTGATGAAACGTTCTGATCAGCACCTGCTCTGTCACCGCCGACGATGAATA…
TrPHT21	CDS	ATGTTTGGGGACCTGTCGATCAAGGTCAAAGGGGCCGACTGTGGCGTCGATGCCATTTTCCTTGCCATCATCACGTCGATCGGCGGCTTCCTTTTCGGCTACGACATTGGTCAGATCTCTGGCACCATTGTTTTCGACGACTTTGTCCATCGGTTCCTCACTAATGGCTCGCCCACGATCAAGTCTCTTCTGGTCTCTTTCTTCAGCATTGGCTGCCTCTTTGGCGCGCTGGCCGGCGCGTACACGTCAGATTGGTTGGGACGACGAAAGAGCATCGCCTTGGGGGTGTTCATTTTCATCTTGGGAGATGCCATGCAAGTTACGGCAACGCGTAGCTGGATCCATCTCACCATGGGCAGATTTGTTGCTGGCCTCGGTATCGGAAACCTTTCTGTTGGC…
	Protein	MFGDLSIKVKGADCGVDAIFLAIITSIGGFLFGYDIGQISGTIVFDDFVHRFLTNGSPTIKSLLVSFFSIGCLFGALAGAYTSDWLGRRKSIALGVFIFILGDAMQVTATRSWIHLTMGRFVAGLGIGNLSVGVPMFQSECAPREIRGAVVASYQLLITIGILFGNVVCYFMRRHQEDSETWRLVIGIGALYSIPLGEKARQSLSRLRGKSKDPSNVLVENDMHEMREVLALERQTGNASWIECFSLKSRVPKTRYRTFLGMGLHFLQQWTGINYFFYYGTTIFSTAHIKDPFLVQLILGAVNVATTFLAVYLVDKFGRRWPLILGAIWQAVWLMIFASISTATNHLSTVSSTYGVVMVLSSCMFIASFAATWGPIAWVVMGETFALRTRAKQASLATA…
	Promoter	GATGTCAAGTCTGAGTTTACGCAATAGGCGAACTGGTCGAAGTTGAGAACGGAAGAACGTGACGATATTGATACGAAAGCGAAGCCTCGGCTCCGGTGGTAAATCCTAACAAACGATCGATGCTCGAGAAACGATGGGAGAGCTGTGCCCTGTGGACGAAAGAATGAGTAAGAATTTCTGCTGATGCTACCAATGTAGCTACGCCTCGACGAGGCGGCTGCGAGAAGTGAGTTGAAAGTAAGTAAAAAAACGTACCTCAGCAGGTGGAAGAAAATCGGACTGCCTTCCGTAGGAAGAAGGCTCTCGGTAACGAGGGAACTTGTTGTGTTGTGTAGAAGGAAAATTCCAATGTTCCGTGGGGGGGAAGCTTTGGGTCAACTTGCCCAAATTTCGGCAGCT…
TrPHT22	CDS	ATGGTGCTCCATCAGTATGACTACATCTTTGCCATTGGCACTCTGTTTGCCATGCTGGATGCCTACAACAACGGTGCCAACGATGTTGCCAACTCTTGGGCCACCAGTGTCTCATCTAGGTCCATCTCCTACCGACAGGCCATGATCTTCGGTACCGTCTTCGAAATGCTCGGAGCCATCACTGTTGGTGCCCGAACGGCCGATACCATCAAGAACGGCATCATCCCCAACTCTGCCTTCCAGGGCAACGCCGGTGTCCAGATGCTCGCCTTCACCTGCGCCCTCGCCGCCGCTTCCTCTTGGGTCATGTGGTGCACTCGTCACTCCGCTCACGTTTCTTCCACCTACTCCCTCATCTCTGCTGTCGCTGGTGTCGGTGTTGCTACTGTCGGTGCTAGC…
	Protein	MVLHQYDYIFAIGTLFAMLDAYNNGANDVANSWATSVSSRSISYRQAMIFGTVFEMLGAITVGARTADTIKNGIIPNSAFQGNAGVQMLAFTCALAAASSWVMWCTRHSAHVSSTYSLISAVAGVGVATVGASKVQWGWNDGKGLGAIFAGLGMAPAISGGFAAAIFLLIRFVVHVRKNPTPWAVYSSPFFFLVAATICTLSIVYKGSPNLGLGKKPAWYIAAVTMGTGGGVALLSAIFFVPFARAKILKKDYTVKWWMFILGPLLWNRPAPADAETAAVPDYAVVQHHKDDQHSSGNSVDESLDGEALKNDVDATTTPADAEKNISAVEAARPTYAELMAENQNRLNARLYKKRGPIGWAMRTLRDNPMGPGEIYEFKNIKILAIRIPAMITAGLLYG…
	Promoter	TTTGACGGATGTGCGTTTCAGCAACCCCAAGCTGTAGGAAGGGTGATCCTGCAAAGATTGGAATGGGGATAGTAAAGAGTCAAGCCGGAAGAGAAGTCCAAGGGCAGTCGCACAGGACGCTTCTTAAATATTATATCCCCAGCTCTAACTCGTACGTGTACTACATATGTAACCTGCACCCAGCACCAGGTCCCCTGGGTACCAGCCCAAGAGTGCATATTCTCCTCGGTCCAGGTTCCATCGTTATCCGCATGCTCCATAGCCACTATCGTATTGTGCGTCCCACGCACGACAAGAAGGAAGACAAGAGGCAAGATGGGGTAGAAACATCGTGGTCCTTTCCCCGTTGGGACACCGACGTCGTCAATGCACACTTTTGGGCAAAGAATAGATCAGCAT…

## Sheet: Table S4
Table S4. The conserved domain of TrPHTs.
Gene symbol	conserved domain	from	to
TrPHT1	phosphate:H+ symporter	33	537
TrPHT2	phosphate:H+ symporter	51	568
TrPHT3	phosphate:H+ symporter	51	527
TrPHT4	MFS	107	540
TrPHT5	MFS	45	418
TrPHT6	MFS	26	395
TrPHT7	MFS	46	456
TrPHT8	Sugar transporter	32	530
TrPHT9	MFS	8	490
TrPHT10	MFS	63	510
TrPHT11	Sugar transporter	45	521
TrPHT12	MFS	50	511
TrPHT13	Sugar transporter	25	471
TrPHT14	Sugar transporter	12	477
TrPHT15	MFS	98	519
TrPHT16	MFS	71	483
TrPHT17	MFS	1	369
TrPHT18	MFS	37	519
TrPHT19	MFS	21	470
TrPHT20	MFS	64	514
TrPHT21	MFS	20	457
TrPHT22	Na+-phosphate symporter	25	182
TrPHT22	Na+-phosphate symporter	425	589

## Sheet: Table S5
Table S5 The MEME Motif Sequence and Length of TrPHTs.
MOTIF	WIDTH	BEST POSSIBLE MATCH
MEME-1	29	GPVTWLYPAEIFPTRYRAKGMGJSAASNW
MEME-2	29	ITASLSIGTVIGALFFGFJADRLGRKRSI
MEME-3	29	KRTFJGFSLQFFQQLTGINAIIYYAPTIF
MEME-4	20	VYFFIPETKGRTLEEMDAVF
MEME-5	21	RFVAGJGVGGESPLVPVYQAE
MEME-6	29	PESPRWLMKKGREEEAKRVLARIRGKGDD
MEME-7	15	GTFPAVFLIDRVGRR
MEME-8	21	AWRIPIGJGAIPALJLFYGRL
MEME-9	29	KYWKPLLGTAGAWFLYDFAFYGLGJFNST
MEME-10	28	FNFAIGLITPVALEAIKWRTYJFFAVFN

## Sheet: Table S6
Table S6 Cis-acting elements in TrPHTs.
Gene symbol	name	sequence	start	length	strand	function	classical	note
TrPHT1	ARE	AAACCA	595	6	-	cis-acting regulatory element essential for the anaerobic induction	Environment	Anaerobic
TrPHT1	GC-motif	CCCCCG	826	6	-	enhancer-like element involved in anoxic specific inducibility	Environment	Anoxic
TrPHT1	I-box	gGATAAGGTG	1073	9	+	part of a light responsive element	Environment	Light
TrPHT1	I-box	gGATAAGGTG	1712	9	+	part of a light responsive element	Environment	Light
TrPHT1	G-Box	CACGTG	1013	6	-	cis-acting regulatory element involved in light responsiveness	Environment	Light
TrPHT1	G-Box	CACGTT	1428	6	-	cis-acting regulatory element involved in light responsiveness	Environment	Light
TrPHT1	GATA-motif	GATAGGG	985	7	+	part of a light responsive element	Environment	Light
TrPHT1	LAMP-element	CCTTATCCA	1072	9	-	part of a light responsive element	Environment	Light
TrPHT1	G-box	TACGTG	940	6	+	cis-acting regulatory element involved in light responsiveness	Environment	Light
TrPHT1	G-box	CACGTG	1013	6	-	cis-acting regulatory element involved in light responsiveness	Environment	Light
TrPHT1	G-box	CACGTC	1268	6	-	cis-acting regulatory element involved in light responsiveness	Environment	Light
TrPHT1	G-box	CACGTC	1759	6	-	cis-acting regulatory element involved in light responsiveness	Environment	Light
TrPHT1	TCCC-motif	TCTCCCT	150	7	+	part of a light responsive element	Environment	Light
TrPHT1	Box 4	ATTAAT	1738	6	-	part of a conserved DNA module involved in light responsiveness	Environment	Light
TrPHT1	LTR	CCGAAA	1157	6	-	cis-acting element involved in low-temperature responsiveness	Environment	Low-temperature
TrPHT1	ABRE	ACGTG	941	5	+	cis-acting element involved in the abscisic acid responsiveness	Phytohormone	Abscisic acid
TrPHT1	ABRE	CACGTG	1013	6	-	cis-acting element involved in the abscisic acid responsiveness	Phytohormone	Abscisic acid
TrPHT1	ABRE	ACGTG	1014	5	+	cis-acting element involved in the abscisic acid responsiveness	Phytohormone	Abscisic acid
TrPHT1	ABRE	ACGTG	1269	5	+	cis-acting element involved in the abscisic acid responsiveness	Phytohormone	Abscisic acid
TrPHT1	ABRE	ACGTG	1429	5	+	cis-acting element involved in the abscisic acid responsiveness	Phytohormone	Abscisic acid
TrPHT1	ABRE	ACGTG	1760	5	+	cis-acting element involved in the abscisic acid responsiveness	Phytohormone	Abscisic acid
TrPHT1	TGA-element	AACGAC	303	6	+	auxin-responsive element	Phytohormone	Auxin
TrPHT1	TGA-element	AACGAC	572	6	-	auxin-responsive element	Phytohormone	Auxin
TrPHT1	CGTCA-motif	CGTCA	208	5	-	cis-acting regulatory element involved in the MeJA-responsiveness	Phytohormone	MeJA
TrPHT1	CGTCA-motif	CGTCA	226	5	+	cis-acting regulatory element involved in the MeJA-responsiveness	Phytohormone	MeJA
TrPHT1	CGTCA-motif	CGTCA	284	5	-	cis-acting regulatory element involved in the MeJA-responsiveness	Phytohormone	MeJA
TrPHT1	CGTCA-motif	CGTCA	1294	5	+	cis-acting regulatory element involved in the MeJA-responsiveness	Phytohormone	MeJA
TrPHT1	TGACG-motif	TGACG	208	5	+	cis-acting regulatory element involved in the MeJA-responsiveness	Phytohormone	MeJA
TrPHT1	TGACG-motif	TGACG	226	5	-	cis-acting regulatory element involved in the MeJA-responsiveness	Phytohormone	MeJA
TrPHT1	TGACG-motif	TGACG	284	5	+	cis-acting regulatory element involved in the MeJA-responsiveness	Phytohormone	MeJA
TrPHT1	TGACG-motif	TGACG	1294	5	-	cis-acting regulatory element involved in the MeJA-responsiveness	Phytohormone	MeJA
TrPHT1	O2-site	GATGATGTGG	179	9	+	cis-acting regulatory element involved in zein metabolism regulation	Phytohormone	Zein
TrPHT1	MBS	CAACTG	901	6	-	MYB binding site involved in drought-inducibility	TF	MYB Binding Site
TrPHT1	CAT-box	GCCACT	918	6	-	cis-acting regulatory element related to meristem expression	Tissue	Meristem
TrPHT10	GC-motif	CCCCCG	1712	6	+	enhancer-like element involved in anoxic specific inducibility	Environment	Anoxic
TrPHT10	ATCT-motif	AATCTAATCC	1908	9	+	part of a conserved DNA module involved in light responsiveness	Environment	Light
TrPHT10	GA-motif	ATAGATAA	1433	8	-	part of a light responsive element	Environment	Light
TrPHT10	G-Box	CACGTG	410	6	+	cis-acting regulatory element involved in light responsiveness	Environment	Light
TrPHT10	GATA-motif	GATAGGA	185	7	+	part of a light responsive element	Environment	Light
TrPHT10	GATA-motif	GATAGGA	1138	7	+	part of a light responsive element	Environment	Light
TrPHT10	AE-box	AGAAACAA	1302	8	-	part of a module for light response	Environment	Light
TrPHT10	G-box	CTTCCACGTGGCA	407	12	-	cis-acting regulatory element involved in light responsiveness	Environment	Light
TrPHT10	G-box	GCCACGTGGA	408	9	+	cis-acting regulatory element involved in light responsiveness	Environment	Light
TrPHT10	G-box	CACGTG	410	6	+	cis-acting regulatory element involved in light responsiveness	Environment	Light
TrPHT10	G-box	CACGAC	1442	6	+	cis-acting regulatory element involved in light responsiveness	Environment	Light
TrPHT10	G-box	CACGAC	1834	6	-	cis-acting regulatory element involved in light responsiveness	Environment	Light
TrPHT10	WUN-motif	AAATTTCCT	855	9	-	wound-responsive element	Environment	Wound
TrPHT10	ABRE	CACGTG	410	6	+	cis-acting element involved in the abscisic acid responsiveness	Phytohormone	Abscisic acid
TrPHT10	ABRE	ACGTG	411	5	+	cis-acting element involved in the abscisic acid responsiveness	Phytohormone	Abscisic acid
TrPHT10	AuxRR-core	GGTCCAT	670	7	+	cis-acting regulatory element involved in auxin responsiveness	Phytohormone	Auxin
TrPHT10	TGACG-motif	TGACG	1165	5	+	cis-acting regulatory element involved in the MeJA-responsiveness	Phytohormone	MeJA
TrPHT10	TGACG-motif	TGACG	1716	5	-	cis-acting regulatory element involved in the MeJA-responsiveness	Phytohormone	MeJA
TrPHT10	CGTCA-motif	CGTCA	1165	5	-	cis-acting regulatory element involved in the MeJA-responsiveness	Phytohormone	MeJA
TrPHT10	CGTCA-motif	CGTCA	1716	5	+	cis-acting regulatory element involved in the MeJA-responsiveness	Phytohormone	MeJA
TrPHT10	TCA-element	CCATCTTTTT	539	9	+	cis-acting element involved in salicylic acid responsiveness	Phytohormone	Salicylic acid
TrPHT10	O2-site	GTTGACGTGA	1242	9	+	cis-acting regulatory element involved in zein metabolism regulation	Phytohormone	Zein
TrPHT10	CCAAT-box	CAACGG	489	6	-	MYBHv1 binding site	TF	MYB Binding Site
TrPHT10	CCAAT-box	CAACGG	771	6	+	MYBHv1 binding site	TF	MYB Binding Site
TrPHT10	CCAAT-box	CAACGG	1118	6	+	MYBHv1 binding site	TF	MYB Binding Site
TrPHT10	CAT-box	GCCACT	602	6	-	cis-acting regulatory element related to meristem expression	Tissue	Meristem
TrPHT11	ARE	AAACCA	1395	6	-	cis-acting regulatory element essential for the anaerobic induction	Environment	Anaerobic
TrPHT11	GC-motif	CCCCCG	9	6	-	enhancer-like element involved in anoxic specific inducibility	Environment	Anoxic
TrPHT11	GC-motif	CCCCCG	93	6	-	enhancer-like element involved in anoxic specific inducibility	Environment	Anoxic
TrPHT11	GC-motif	CCCCCG	1722	6	+	enhancer-like element involved in anoxic specific inducibility	Environment	Anoxic
TrPHT11	G-box	CACGTC	71	6	-	cis-acting regulatory element involved in light responsiveness	Environment	Light
TrPHT11	G-box	GCCACGTGGA	1170	9	-	cis-acting regulatory element involved in light responsiveness	Environment	Light
TrPHT11	G-box	CACGTG	1172	6	-	cis-acting regulatory element involved in light responsiveness	Environment	Light
TrPHT11	I-box	cGATAAGGCG	442	9	+	part of a light responsive element	Environment	Light
TrPHT11	I-box	AAGATAAGGCT	581	10	-	part of a light responsive element	Environment	Light
TrPHT11	I-box	cGATAAGGCG	655	9	-	part of a light responsive element	Environment	Light
TrPHT11	G-Box	CACGTG	1172	6	-	cis-acting regulatory element involved in light responsiveness	Environment	Light
TrPHT11	TCCC-motif	TCTCCCT	780	7	-	part of a light responsive element	Environment	Light
TrPHT11	Sp1	GGGCGG	1589	6	-	light responsive element	Environment	Light
TrPHT11	LTR	CCGAAA	1161	6	-	cis-acting element involved in low-temperature responsiveness	Environment	Low-temperature
TrPHT11	ABRE	ACGTG	72	5	+	cis-acting element involved in the abscisic acid responsiveness	Phytohormone	Abscisic acid
TrPHT11	ABRE	CACGTG	1172	6	-	cis-acting element involved in the abscisic acid responsiveness	Phytohormone	Abscisic acid
TrPHT11	ABRE	ACGTG	1173	5	+	cis-acting element involved in the abscisic acid responsiveness	Phytohormone	Abscisic acid
TrPHT11	ABRE	AACCCGG	1296	7	+	cis-acting element involved in the abscisic acid responsiveness	Phytohormone	Abscisic acid
TrPHT11	TGA-element	AACGAC	830	6	-	auxin-responsive element	Phytohormone	Auxin
TrPHT11	P-box	CCTTTTG	24	7	+	gibberellin-responsive element	Phytohormone	Gibberellin
TrPHT11	CGTCA-motif	CGTCA	45	5	-	cis-acting regulatory element involved in the MeJA-responsiveness	Phytohormone	MeJA
TrPHT11	CGTCA-motif	CGTCA	321	5	-	cis-acting regulatory element involved in the MeJA-responsiveness	Phytohormone	MeJA
TrPHT11	CGTCA-motif	CGTCA	576	5	-	cis-acting regulatory element involved in the MeJA-responsiveness	Phytohormone	MeJA
TrPHT11	CGTCA-motif	CGTCA	816	5	+	cis-acting regulatory element involved in the MeJA-responsiveness	Phytohormone	MeJA
TrPHT11	CGTCA-motif	CGTCA	1026	5	-	cis-acting regulatory element involved in the MeJA-responsiveness	Phytohormone	MeJA
TrPHT11	TGACG-motif	TGACG	45	5	+	cis-acting regulatory element involved in the MeJA-responsiveness	Phytohormone	MeJA
TrPHT11	TGACG-motif	TGACG	321	5	+	cis-acting regulatory element involved in the MeJA-responsiveness	Phytohormone	MeJA
TrPHT11	TGACG-motif	TGACG	576	5	+	cis-acting regulatory element involved in the MeJA-responsiveness	Phytohormone	MeJA
TrPHT11	TGACG-motif	TGACG	816	5	-	cis-acting regulatory element involved in the MeJA-responsiveness	Phytohormone	MeJA
TrPHT11	TGACG-motif	TGACG	1026	5	+	cis-acting regulatory element involved in the MeJA-responsiveness	Phytohormone	MeJA
TrPHT11	O2-site	GATGACATGG	1491	9	-	cis-acting regulatory element involved in zein metabolism regulation	Phytohormone	Zein
TrPHT11	MBS	CAACTG	269	6	-	MYB binding site involved in drought-inducibility	TF	MYB Binding Site
TrPHT11	CCAAT-box	CAACGG	1555	6	+	MYBHv1 binding site	TF	MYB Binding Site
TrPHT11	CAT-box	GCCACT	510	6	-	cis-acting regulatory element related to meristem expression	Tissue	Meristem
TrPHT12	ARE	AAACCA	1273	6	-	cis-acting regulatory element essential for the anaerobic induction	Environment	Anaerobic
TrPHT12	GC-motif	CCCCCG	329	6	+	enhancer-like element involved in anoxic specific inducibility	Environment	Anoxic
TrPHT12	GC-motif	CCCCCG	1214	6	-	enhancer-like element involved in anoxic specific inducibility	Environment	Anoxic
TrPHT12	Sp1	GGGCGG	490	6	-	light responsive element	Environment	Light
TrPHT12	Sp1	GGGCGG	701	6	+	light responsive element	Environment	Light
TrPHT12	Sp1	GGGCGG	1247	6	-	light responsive element	Environment	Light
TrPHT12	GATA-motif	GATAGGG	904	7	+	part of a light responsive element	Environment	Light
TrPHT12	GT1-motif	GGTTAA	454	6	-	light responsive element	Environment	Light
TrPHT12	AE-box	AGAAACAA	1057	8	+	part of a module for light response	Environment	Light
TrPHT12	G-box	CACGAC	1632	6	-	cis-acting regulatory element involved in light responsiveness	Environment	Light
TrPHT12	G-box	CACGAC	1707	6	-	cis-acting regulatory element involved in light responsiveness	Environment	Light
TrPHT12	G-box	CACGTC	1871	6	+	cis-acting regulatory element involved in light responsiveness	Environment	Light
TrPHT12	L-box	ATCCCACCTAC	7	10	-	part of a light responsive element	Environment	Light
TrPHT12	TCCC-motif	TCTCCCT	1521	7	+	part of a light responsive element	Environment	Light
TrPHT12	ATCT-motif	AATCTAATCC	136	9	-	part of a conserved DNA module involved in light responsiveness	Environment	Light
TrPHT12	LTR	CCGAAA	222	6	+	cis-acting element involved in low-temperature responsiveness	Environment	Low-temperature
TrPHT12	ABRE	GCCGCGTGGC	500	9	-	cis-acting element involved in the abscisic acid responsiveness	Phytohormone	Abscisic acid
TrPHT12	ABRE	AACCCGG	1256	7	+	cis-acting element involved in the abscisic acid responsiveness	Phytohormone	Abscisic acid
TrPHT12	ABRE	ACGTG	1871	5	-	cis-acting element involved in the abscisic acid responsiveness	Phytohormone	Abscisic acid
TrPHT12	AuxRR-core	GGTCCAT	92	7	-	cis-acting regulatory element involved in auxin responsiveness	Phytohormone	Auxin
TrPHT12	CGTCA-motif	CGTCA	625	5	+	cis-acting regulatory element involved in the MeJA-responsiveness	Phytohormone	MeJA
TrPHT12	CGTCA-motif	CGTCA	716	5	+	cis-acting regulatory element involved in the MeJA-responsiveness	Phytohormone	MeJA
TrPHT12	CGTCA-motif	CGTCA	1541	5	+	cis-acting regulatory element involved in the MeJA-responsiveness	Phytohormone	MeJA
TrPHT12	CGTCA-motif	CGTCA	1754	5	-	cis-acting regulatory element involved in the MeJA-responsiveness	Phytohormone	MeJA
TrPHT12	CGTCA-motif	CGTCA	1873	5	+	cis-acting regulatory element involved in the MeJA-responsiveness	Phytohormone	MeJA
TrPHT12	TGACG-motif	TGACG	625	5	-	cis-acting regulatory element involved in the MeJA-responsiveness	Phytohormone	MeJA
TrPHT12	TGACG-motif	TGACG	716	5	-	cis-acting regulatory element involved in the MeJA-responsiveness	Phytohormone	MeJA
TrPHT12	TGACG-motif	TGACG	1541	5	-	cis-acting regulatory element involved in the MeJA-responsiveness	Phytohormone	MeJA
TrPHT12	TGACG-motif	TGACG	1754	5	+	cis-acting regulatory element involved in the MeJA-responsiveness	Phytohormone	MeJA
TrPHT12	TGACG-motif	TGACG	1873	5	-	cis-acting regulatory element involved in the MeJA-responsiveness	Phytohormone	MeJA
TrPHT12	TCA-element	CCATCTTTTT	991	9	-	cis-acting element involved in salicylic acid responsiveness	Phytohormone	Salicylic acid
TrPHT12	MBS	CAACTG	1750	6	-	MYB binding site involved in drought-inducibility	TF	MYB Binding Site
TrPHT12	CAT-box	GCCACT	1694	6	-	cis-acting regulatory element related to meristem expression	Tissue	Meristem
TrPHT12	CAT-box	GCCACT	1815	6	+	cis-acting regulatory element related to meristem expression	Tissue	Meristem
TrPHT13	ARE	AAACCA	993	6	-	cis-acting regulatory element essential for the anaerobic induction	Environment	Anaerobic
TrPHT13	GC-motif	CCCCCG	1588	6	+	enhancer-like element involved in anoxic specific inducibility	Environment	Anoxic
TrPHT13	TCT-motif	TCTTAC	561	6	+	part of a light responsive element	Environment	Light
TrPHT13	TCT-motif	TCTTAC	1347	6	-	part of a light responsive element	Environment	Light
TrPHT13	G-Box	CACGTT	328	6	+	cis-acting regulatory element involved in light responsiveness	Environment	Light
TrPHT13	G-Box	CACGTT	710	6	+	cis-acting regulatory element involved in light responsiveness	Environment	Light
TrPHT13	G-Box	CACGTT	885	6	+	cis-acting regulatory element involved in light responsiveness	Environment	Light
TrPHT13	G-Box	CACGTG	1387	6	-	cis-acting regulatory element involved in light responsiveness	Environment	Light
TrPHT13	G-Box	CACGTT	1556	6	+	cis-acting regulatory element involved in light responsiveness	Environment	Light
TrPHT13	3-AF1 binding site	TAAGAGAGGAA	614	10	+	light responsive element	Environment	Light
TrPHT13	G-box	TACGTG	1058	6	-	cis-acting regulatory element involved in light responsiveness	Environment	Light
TrPHT13	G-box	CACGTG	1387	6	-	cis-acting regulatory element involved in light responsiveness	Environment	Light
TrPHT13	G-box	CACGAC	1769	6	-	cis-acting regulatory element involved in light responsiveness	Environment	Light
TrPHT13	ABRE	ACGTG	328	5	-	cis-acting element involved in the abscisic acid responsiveness	Phytohormone	Abscisic acid
TrPHT13	ABRE	ACGTG	710	5	-	cis-acting element involved in the abscisic acid responsiveness	Phytohormone	Abscisic acid
TrPHT13	ABRE	ACGTG	885	5	-	cis-acting element involved in the abscisic acid responsiveness	Phytohormone	Abscisic acid
TrPHT13	ABRE	ACGTG	1058	5	-	cis-acting element involved in the abscisic acid responsiveness	Phytohormone	Abscisic acid
TrPHT13	ABRE	CGTACGTGCA	1385	9	+	cis-acting element involved in the abscisic acid responsiveness	Phytohormone	Abscisic acid
TrPHT13	ABRE	CACGTG	1387	6	-	cis-acting element involved in the abscisic acid responsiveness	Phytohormone	Abscisic acid
TrPHT13	ABRE	ACGTG	1388	5	+	cis-acting element involved in the abscisic acid responsiveness	Phytohormone	Abscisic acid
TrPHT13	ABRE	ACGTG	1556	5	-	cis-acting element involved in the abscisic acid responsiveness	Phytohormone	Abscisic acid
TrPHT13	AuxRR-core	GGTCCAT	195	7	-	cis-acting regulatory element involved in auxin responsiveness	Phytohormone	Auxin
TrPHT13	AuxRR-core	GGTCCAT	1609	7	+	cis-acting regulatory element involved in auxin responsiveness	Phytohormone	Auxin
TrPHT13	TGACG-motif	TGACG	337	5	+	cis-acting regulatory element involved in the MeJA-responsiveness	Phytohormone	MeJA
TrPHT13	TGACG-motif	TGACG	489	5	+	cis-acting regulatory element involved in the MeJA-responsiveness	Phytohormone	MeJA
TrPHT13	TGACG-motif	TGACG	870	5	+	cis-acting regulatory element involved in the MeJA-responsiveness	Phytohormone	MeJA
TrPHT13	TGACG-motif	TGACG	1127	5	+	cis-acting regulatory element involved in the MeJA-responsiveness	Phytohormone	MeJA
TrPHT13	TGACG-motif	TGACG	1673	5	+	cis-acting regulatory element involved in the MeJA-responsiveness	Phytohormone	MeJA
TrPHT13	TGACG-motif	TGACG	1722	5	+	cis-acting regulatory element involved in the MeJA-responsiveness	Phytohormone	MeJA
TrPHT13	CGTCA-motif	CGTCA	337	5	-	cis-acting regulatory element involved in the MeJA-responsiveness	Phytohormone	MeJA
TrPHT13	CGTCA-motif	CGTCA	489	5	-	cis-acting regulatory element involved in the MeJA-responsiveness	Phytohormone	MeJA
TrPHT13	CGTCA-motif	CGTCA	870	5	-	cis-acting regulatory element involved in the MeJA-responsiveness	Phytohormone	MeJA
TrPHT13	CGTCA-motif	CGTCA	1127	5	-	cis-acting regulatory element involved in the MeJA-responsiveness	Phytohormone	MeJA
TrPHT13	CGTCA-motif	CGTCA	1673	5	-	cis-acting regulatory element involved in the MeJA-responsiveness	Phytohormone	MeJA
TrPHT13	CGTCA-motif	CGTCA	1722	5	-	cis-acting regulatory element involved in the MeJA-responsiveness	Phytohormone	MeJA
TrPHT13	TCA-element	CCATCTTTTT	1275	9	+	cis-acting element involved in salicylic acid responsiveness	Phytohormone	Salicylic acid
TrPHT13	O2-site	GTTGACGTGA	1671	9	+	cis-acting regulatory element involved in zein metabolism regulation	Phytohormone	Zein
TrPHT13	CCAAT-box	CAACGG	1666	6	+	MYBHv1 binding site	TF	MYB Binding Site
TrPHT13	MBS	CAACTG	969	6	+	MYB binding site involved in drought-inducibility	TF	MYB Binding Site
TrPHT13	CAT-box	GCCACT	757	6	-	cis-acting regulatory element related to meristem expression	Tissue	Meristem
TrPHT13	CAT-box	GCCACT	1503	6	+	cis-acting regulatory element related to meristem expression	Tissue	Meristem
TrPHT14	GC-motif	CCCCCG	1520	6	-	enhancer-like element involved in anoxic specific inducibility	Environment	Anoxic
TrPHT14	AAAC-motif	CAATCAAAACCT	1252	11	+	light responsive element	Environment	Light
TrPHT14	AE-box	AGAAACAA	1727	8	+	part of a module for light response	Environment	Light
TrPHT14	G-box	TACGTG	510	6	+	cis-acting regulatory element involved in light responsiveness	Environment	Light
TrPHT14	G-box	TACGTG	1173	6	+	cis-acting regulatory element involved in light responsiveness	Environment	Light
TrPHT14	Box 4	ATTAAT	204	6	+	part of a conserved DNA module involved in light responsiveness	Environment	Light
TrPHT14	Box 4	ATTAAT	519	6	+	part of a conserved DNA module involved in light responsiveness	Environment	Light
TrPHT14	LTR	CCGAAA	122	6	-	cis-acting element involved in low-temperature responsiveness	Environment	Low-temperature
TrPHT14	ABRE	ACGTG	511	5	+	cis-acting element involved in the abscisic acid responsiveness	Phytohormone	Abscisic acid
TrPHT14	ABRE	ACGTG	1174	5	+	cis-acting element involved in the abscisic acid responsiveness	Phytohormone	Abscisic acid
TrPHT14	TGA-element	AACGAC	601	6	+	auxin-responsive element	Phytohormone	Auxin
TrPHT14	CGTCA-motif	CGTCA	333	5	+	cis-acting regulatory element involved in the MeJA-responsiveness	Phytohormone	MeJA
TrPHT14	CGTCA-motif	CGTCA	613	5	+	cis-acting regulatory element involved in the MeJA-responsiveness	Phytohormone	MeJA
TrPHT14	CGTCA-motif	CGTCA	1266	5	-	cis-acting regulatory element involved in the MeJA-responsiveness	Phytohormone	MeJA
TrPHT14	CGTCA-motif	CGTCA	1299	5	+	cis-acting regulatory element involved in the MeJA-responsiveness	Phytohormone	MeJA
TrPHT14	TGACG-motif	TGACG	333	5	-	cis-acting regulatory element involved in the MeJA-responsiveness	Phytohormone	MeJA
TrPHT14	TGACG-motif	TGACG	613	5	-	cis-acting regulatory element involved in the MeJA-responsiveness	Phytohormone	MeJA
TrPHT14	TGACG-motif	TGACG	1266	5	+	cis-acting regulatory element involved in the MeJA-responsiveness	Phytohormone	MeJA
TrPHT14	TGACG-motif	TGACG	1299	5	-	cis-acting regulatory element involved in the MeJA-responsiveness	Phytohormone	MeJA
TrPHT14	MBS	CAACTG	1930	6	-	MYB binding site involved in drought-inducibility	TF	MYB Binding Site
TrPHT15	G-box	TACGTG	24	6	-	cis-acting regulatory element involved in light responsiveness	Environment	Light
TrPHT15	G-box	CACGAC	129	6	-	cis-acting regulatory element involved in light responsiveness	Environment	Light
TrPHT15	G-box	TACGTG	163	6	-	cis-acting regulatory element involved in light responsiveness	Environment	Light
TrPHT15	G-box	CACGTC	1013	6	+	cis-acting regulatory element involved in light responsiveness	Environment	Light
TrPHT15	G-box	CACGAC	1087	6	-	cis-acting regulatory element involved in light responsiveness	Environment	Light
TrPHT15	G-box	CACGAC	1774	6	-	cis-acting regulatory element involved in light responsiveness	Environment	Light
TrPHT15	AE-box	AGAAACAA	180	8	-	part of a module for light response	Environment	Light
TrPHT15	Sp1	GGGCGG	985	6	+	light responsive element	Environment	Light
TrPHT15	Sp1	GGGCGG	1630	6	-	light responsive element	Environment	Light
TrPHT15	Sp1	GGGCGG	1920	6	+	light responsive element	Environment	Light
TrPHT15	I-box	AAGATAAGGCT	1200	10	-	part of a light responsive element	Environment	Light
TrPHT15	G-Box	CACGTT	1000	6	+	cis-acting regulatory element involved in light responsiveness	Environment	Light
TrPHT15	ACE	GACACGTATG	161	9	+	cis-acting element involved in light responsiveness	Environment	Light
TrPHT15	TC-rich repeats	ATTCTCTAAC	233	9	-	cis-acting element involved in defense and stress responsiveness	Environment	Mixed stress
TrPHT15	ABRE	ACGTG	24	5	-	cis-acting element involved in the abscisic acid responsiveness	Phytohormone	Abscisic acid
TrPHT15	ABRE	ACGTG	163	5	-	cis-acting element involved in the abscisic acid responsiveness	Phytohormone	Abscisic acid
TrPHT15	ABRE	GCCGCGTGGC	620	9	-	cis-acting element involved in the abscisic acid responsiveness	Phytohormone	Abscisic acid
TrPHT15	ABRE	ACGTG	1000	5	-	cis-acting element involved in the abscisic acid responsiveness	Phytohormone	Abscisic acid
TrPHT15	ABRE	ACGTG	1013	5	-	cis-acting element involved in the abscisic acid responsiveness	Phytohormone	Abscisic acid
TrPHT15	TGA-element	AACGAC	1979	6	-	auxin-responsive element	Phytohormone	Auxin
TrPHT15	AuxRR-core	GGTCCAT	348	7	+	cis-acting regulatory element involved in auxin responsiveness	Phytohormone	Auxin
TrPHT15	P-box	CCTTTTG	1582	7	+	gibberellin-responsive element	Phytohormone	Gibberellin
TrPHT15	CGTCA-motif	CGTCA	18	5	+	cis-acting regulatory element involved in the MeJA-responsiveness	Phytohormone	MeJA
TrPHT15	CGTCA-motif	CGTCA	295	5	-	cis-acting regulatory element involved in the MeJA-responsiveness	Phytohormone	MeJA
TrPHT15	CGTCA-motif	CGTCA	505	5	+	cis-acting regulatory element involved in the MeJA-responsiveness	Phytohormone	MeJA
TrPHT15	CGTCA-motif	CGTCA	740	5	-	cis-acting regulatory element involved in the MeJA-responsiveness	Phytohormone	MeJA
TrPHT15	CGTCA-motif	CGTCA	1150	5	-	cis-acting regulatory element involved in the MeJA-responsiveness	Phytohormone	MeJA
TrPHT15	CGTCA-motif	CGTCA	1335	5	+	cis-acting regulatory element involved in the MeJA-responsiveness	Phytohormone	MeJA
TrPHT15	CGTCA-motif	CGTCA	1735	5	+	cis-acting regulatory element involved in the MeJA-responsiveness	Phytohormone	MeJA
TrPHT15	TGACG-motif	TGACG	18	5	-	cis-acting regulatory element involved in the MeJA-responsiveness	Phytohormone	MeJA
TrPHT15	TGACG-motif	TGACG	295	5	+	cis-acting regulatory element involved in the MeJA-responsiveness	Phytohormone	MeJA
TrPHT15	TGACG-motif	TGACG	505	5	-	cis-acting regulatory element involved in the MeJA-responsiveness	Phytohormone	MeJA
TrPHT15	TGACG-motif	TGACG	740	5	+	cis-acting regulatory element involved in the MeJA-responsiveness	Phytohormone	MeJA
TrPHT15	TGACG-motif	TGACG	1150	5	+	cis-acting regulatory element involved in the MeJA-responsiveness	Phytohormone	MeJA
TrPHT15	TGACG-motif	TGACG	1335	5	-	cis-acting regulatory element involved in the MeJA-responsiveness	Phytohormone	MeJA
TrPHT15	TGACG-motif	TGACG	1735	5	-	cis-acting regulatory element involved in the MeJA-responsiveness	Phytohormone	MeJA
TrPHT15	circadian	CAAAGATATC	449	9	-	cis-acting regulatory element involved in circadian control	Stage	Circadian
TrPHT16	ARE	AAACCA	450	6	+	cis-acting regulatory element essential for the anaerobic induction	Environment	Anaerobic
TrPHT16	ARE	AAACCA	633	6	+	cis-acting regulatory element essential for the anaerobic induction	Environment	Anaerobic
TrPHT16	ARE	AAACCA	829	6	-	cis-acting regulatory element essential for the anaerobic induction	Environment	Anaerobic
TrPHT16	ARE	AAACCA	883	6	+	cis-acting regulatory element essential for the anaerobic induction	Environment	Anaerobic
TrPHT16	GT1-motif	GGTTAAT	229	7	+	light responsive element	Environment	Light
TrPHT16	G-box	TACGTG	46	6	-	cis-acting regulatory element involved in light responsiveness	Environment	Light
TrPHT16	G-box	CACGAC	258	6	+	cis-acting regulatory element involved in light responsiveness	Environment	Light
TrPHT16	G-box	CACGAC	1225	6	+	cis-acting regulatory element involved in light responsiveness	Environment	Light
TrPHT16	GATA-motif	AAGATAAGATT	1052	10	-	part of a light responsive element	Environment	Light
TrPHT16	Sp1	GGGCGG	1349	6	-	light responsive element	Environment	Light
TrPHT16	G-Box	CACGTT	1523	6	+	cis-acting regulatory element involved in light responsiveness	Environment	Light
TrPHT16	Box 4	ATTAAT	15	6	+	part of a conserved DNA module involved in light responsiveness	Environment	Light
TrPHT16	TCCC-motif	TCTCCCT	1327	7	+	part of a light responsive element	Environment	Light
TrPHT16	ABRE	ACGTG	46	5	-	cis-acting element involved in the abscisic acid responsiveness	Phytohormone	Abscisic acid
TrPHT16	ABRE	AACCCGG	1021	7	+	cis-acting element involved in the abscisic acid responsiveness	Phytohormone	Abscisic acid
TrPHT16	ABRE	ACGTG	1523	5	-	cis-acting element involved in the abscisic acid responsiveness	Phytohormone	Abscisic acid
TrPHT16	ABRE	GCCGCGTGGC	1971	9	-	cis-acting element involved in the abscisic acid responsiveness	Phytohormone	Abscisic acid
TrPHT16	TGA-element	AACGAC	8	6	-	auxin-responsive element	Phytohormone	Auxin
TrPHT16	CGTCA-motif	CGTCA	360	5	-	cis-acting regulatory element involved in the MeJA-responsiveness	Phytohormone	MeJA
TrPHT16	CGTCA-motif	CGTCA	806	5	+	cis-acting regulatory element involved in the MeJA-responsiveness	Phytohormone	MeJA
TrPHT16	CGTCA-motif	CGTCA	1706	5	-	cis-acting regulatory element involved in the MeJA-responsiveness	Phytohormone	MeJA
TrPHT16	CGTCA-motif	CGTCA	1895	5	+	cis-acting regulatory element involved in the MeJA-responsiveness	Phytohormone	MeJA
TrPHT16	TGACG-motif	TGACG	360	5	+	cis-acting regulatory element involved in the MeJA-responsiveness	Phytohormone	MeJA
TrPHT16	TGACG-motif	TGACG	806	5	-	cis-acting regulatory element involved in the MeJA-responsiveness	Phytohormone	MeJA
TrPHT16	TGACG-motif	TGACG	1706	5	+	cis-acting regulatory element involved in the MeJA-responsiveness	Phytohormone	MeJA
TrPHT16	TGACG-motif	TGACG	1895	5	-	cis-acting regulatory element involved in the MeJA-responsiveness	Phytohormone	MeJA
TrPHT16	O2-site	GATGACATGG	425	9	-	cis-acting regulatory element involved in zein metabolism regulation	Phytohormone	Zein
TrPHT16	O2-site	GATGATGTGG	1183	9	-	cis-acting regulatory element involved in zein metabolism regulation	Phytohormone	Zein
TrPHT16	circadian	CAAAGATATC	956	9	-	cis-acting regulatory element involved in circadian control	Stage	Circadian
TrPHT16	CAT-box	GCCACT	205	6	+	cis-acting regulatory element related to meristem expression	Tissue	Meristem
TrPHT17	G-box	TAACACGTAG	383	9	+	cis-acting regulatory element involved in light responsiveness	Environment	Light
TrPHT17	G-box	CACGAC	620	6	+	cis-acting regulatory element involved in light responsiveness	Environment	Light
TrPHT17	G-box	CACGTC	989	6	-	cis-acting regulatory element involved in light responsiveness	Environment	Light
TrPHT17	G-box	TACGTG	1660	6	+	cis-acting regulatory element involved in light responsiveness	Environment	Light
TrPHT17	GT1-motif	GGTTAA	470	6	+	light responsive element	Environment	Light
TrPHT17	I-box	GTATAAGGCC	1755	9	+	part of a light responsive element	Environment	Light
TrPHT17	ABRE	ACGTG	990	5	+	cis-acting element involved in the abscisic acid responsiveness	Phytohormone	Abscisic acid
TrPHT17	ABRE	ACGTG	1661	5	+	cis-acting element involved in the abscisic acid responsiveness	Phytohormone	Abscisic acid
TrPHT17	TGACG-motif	TGACG	433	5	+	cis-acting regulatory element involved in the MeJA-responsiveness	Phytohormone	MeJA
TrPHT17	TGACG-motif	TGACG	1086	5	+	cis-acting regulatory element involved in the MeJA-responsiveness	Phytohormone	MeJA
TrPHT17	CGTCA-motif	CGTCA	433	5	-	cis-acting regulatory element involved in the MeJA-responsiveness	Phytohormone	MeJA
TrPHT17	CGTCA-motif	CGTCA	1086	5	-	cis-acting regulatory element involved in the MeJA-responsiveness	Phytohormone	MeJA
TrPHT17	circadian	CAAAGATATC	212	9	-	cis-acting regulatory element involved in circadian control	Stage	Circadian
TrPHT17	circadian	CAAAGATATC	1764	9	+	cis-acting regulatory element involved in circadian control	Stage	Circadian
TrPHT17	MBS	CAACTG	221	6	-	MYB binding site involved in drought-inducibility	TF	MYB Binding Site
TrPHT17	CAT-box	GCCACT	1681	6	+	cis-acting regulatory element related to meristem expression	Tissue	Meristem
TrPHT18	ARE	AAACCA	1018	6	-	cis-acting regulatory element essential for the anaerobic induction	Environment	Anaerobic
TrPHT18	GC-motif	CCCCCG	373	6	-	enhancer-like element involved in anoxic specific inducibility	Environment	Anoxic
TrPHT18	GC-motif	CCCCCG	1160	6	+	enhancer-like element involved in anoxic specific inducibility	Environment	Anoxic
TrPHT18	TCT-motif	TCTTAC	1172	6	-	part of a light responsive element	Environment	Light
TrPHT18	I-box	GTATAAGGCC	668	9	+	part of a light responsive element	Environment	Light
TrPHT18	Sp1	GGGCGG	783	6	-	light responsive element	Environment	Light
TrPHT18	G-box	CACGAC	190	6	-	cis-acting regulatory element involved in light responsiveness	Environment	Light
TrPHT18	G-box	CACGAC	777	6	-	cis-acting regulatory element involved in light responsiveness	Environment	Light
TrPHT18	G-box	CACGTC	1031	6	+	cis-acting regulatory element involved in light responsiveness	Environment	Light
TrPHT18	LTR	CCGAAA	946	6	+	cis-acting element involved in low-temperature responsiveness	Environment	Low-temperature
TrPHT18	LTR	CCGAAA	1163	6	+	cis-acting element involved in low-temperature responsiveness	Environment	Low-temperature
TrPHT18	TC-rich repeats	GTTTTCTTAC	1172	9	-	cis-acting element involved in defense and stress responsiveness	Environment	Mixed stress
TrPHT18	ABRE	TACGGTC	879	7	-	cis-acting element involved in the abscisic acid responsiveness	Phytohormone	Abscisic acid
TrPHT18	ABRE	ACGTG	1031	5	-	cis-acting element involved in the abscisic acid responsiveness	Phytohormone	Abscisic acid
TrPHT18	GARE-motif	TCTGTTG	969	7	-	gibberellin-responsive element	Phytohormone	Gibberellin
TrPHT18	P-box	CCTTTTG	1492	7	+	gibberellin-responsive element	Phytohormone	Gibberellin
TrPHT18	TGACG-motif	TGACG	194	5	+	cis-acting regulatory element involved in the MeJA-responsiveness	Phytohormone	MeJA
TrPHT18	TGACG-motif	TGACG	212	5	-	cis-acting regulatory element involved in the MeJA-responsiveness	Phytohormone	MeJA
TrPHT18	TGACG-motif	TGACG	1914	5	+	cis-acting regulatory element involved in the MeJA-responsiveness	Phytohormone	MeJA
TrPHT18	CGTCA-motif	CGTCA	194	5	-	cis-acting regulatory element involved in the MeJA-responsiveness	Phytohormone	MeJA
TrPHT18	CGTCA-motif	CGTCA	212	5	+	cis-acting regulatory element involved in the MeJA-responsiveness	Phytohormone	MeJA
TrPHT18	CGTCA-motif	CGTCA	1914	5	-	cis-acting regulatory element involved in the MeJA-responsiveness	Phytohormone	MeJA
TrPHT18	TCA-element	TCAGAAGAGG	250	9	+	cis-acting element involved in salicylic acid responsiveness	Phytohormone	Salicylic acid
TrPHT18	CCAAT-box	CAACGG	465	6	+	MYBHv1 binding site	TF	MYB Binding Site
TrPHT18	MBS	CAACTG	737	6	-	MYB binding site involved in drought-inducibility	TF	MYB Binding Site
TrPHT18	MBS	CAACTG	748	6	+	MYB binding site involved in drought-inducibility	TF	MYB Binding Site
TrPHT18	CAT-box	GCCACT	564	6	-	cis-acting regulatory element related to meristem expression	Tissue	Meristem
TrPHT18	CAT-box	GCCACT	743	6	-	cis-acting regulatory element related to meristem expression	Tissue	Meristem
TrPHT18	NON-box	AGATCGACG	128	9	+	cis-acting regulatory element related to meristem specific activation	Tissue	Meristem
TrPHT19	ARE	AAACCA	167	6	-	cis-acting regulatory element essential for the anaerobic induction	Environment	Anaerobic
TrPHT19	ARE	AAACCA	489	6	-	cis-acting regulatory element essential for the anaerobic induction	Environment	Anaerobic
TrPHT19	G-Box	TCCACATGGCA	234	10	+	cis-acting regulatory element involved in light responsiveness	Environment	Light
TrPHT19	GATA-motif	GATAGGA	679	7	+	part of a light responsive element	Environment	Light
TrPHT19	GATA-motif	GATAGGG	1660	7	+	part of a light responsive element	Environment	Light
TrPHT19	G-box	CACGAC	271	6	-	cis-acting regulatory element involved in light responsiveness	Environment	Light
TrPHT19	G-box	TACGTG	710	6	-	cis-acting regulatory element involved in light responsiveness	Environment	Light
TrPHT19	G-box	TACGTG	1313	6	-	cis-acting regulatory element involved in light responsiveness	Environment	Light
TrPHT19	LTR	CCGAAA	255	6	+	cis-acting element involved in low-temperature responsiveness	Environment	Low-temperature
TrPHT19	TC-rich repeats	GTTTTCTTAC	1448	9	-	cis-acting element involved in defense and stress responsiveness	Environment	Mixed stress
TrPHT19	ABRE	ACGTG	710	5	-	cis-acting element involved in the abscisic acid responsiveness	Phytohormone	Abscisic acid
TrPHT19	ABRE	ACGTG	1313	5	-	cis-acting element involved in the abscisic acid responsiveness	Phytohormone	Abscisic acid
TrPHT19	TGA-element	AACGAC	1938	6	-	auxin-responsive element	Phytohormone	Auxin
TrPHT19	TATC-box	TATCCCA	1727	7	-	cis-acting element involved in gibberellin-responsiveness	Phytohormone	gibberellin
TrPHT19	TGACG-motif	TGACG	337	5	+	cis-acting regulatory element involved in the MeJA-responsiveness	Phytohormone	MeJA
TrPHT19	TGACG-motif	TGACG	1427	5	-	cis-acting regulatory element involved in the MeJA-responsiveness	Phytohormone	MeJA
TrPHT19	CGTCA-motif	CGTCA	337	5	-	cis-acting regulatory element involved in the MeJA-responsiveness	Phytohormone	MeJA
TrPHT19	CGTCA-motif	CGTCA	1427	5	+	cis-acting regulatory element involved in the MeJA-responsiveness	Phytohormone	MeJA
TrPHT19	MBS	CAACTG	261	6	+	MYB binding site involved in drought-inducibility	TF	MYB Binding Site
TrPHT19	CAT-box	GCCACT	525	6	+	cis-acting regulatory element related to meristem expression	Tissue	Meristem
TrPHT19	CAT-box	GCCACT	804	6	-	cis-acting regulatory element related to meristem expression	Tissue	Meristem
TrPHT2	GC-motif	CCCCCG	822	6	+	enhancer-like element involved in anoxic specific inducibility	Environment	Anoxic
TrPHT2	Sp1	GGGCGG	1240	6	-	light responsive element	Environment	Light
TrPHT2	ATC-motif	TGCTATCCA	28	9	-	part of a conserved DNA module involved in light responsiveness	Environment	Light
TrPHT2	I-box	cGATAAGGCG	1494	9	-	part of a light responsive element	Environment	Light
TrPHT2	G-Box	CACGTG	1185	6	-	cis-acting regulatory element involved in light responsiveness	Environment	Light
TrPHT2	G-Box	CACGTT	1611	6	+	cis-acting regulatory element involved in light responsiveness	Environment	Light
TrPHT2	G-Box	CACGTT	1664	6	-	cis-acting regulatory element involved in light responsiveness	Environment	Light
TrPHT2	G-box	CACGAC	816	6	-	cis-acting regulatory element involved in light responsiveness	Environment	Light
TrPHT2	G-box	CACGTG	1185	6	-	cis-acting regulatory element involved in light responsiveness	Environment	Light
TrPHT2	Box 4	ATTAAT	1825	6	-	part of a conserved DNA module involved in light responsiveness	Environment	Light
TrPHT2	LTR	CCGAAA	503	6	+	cis-acting element involved in low-temperature responsiveness	Environment	Low-temperature
TrPHT2	LTR	CCGAAA	1106	6	+	cis-acting element involved in low-temperature responsiveness	Environment	Low-temperature
TrPHT2	ABRE	CACGTG	1185	6	-	cis-acting element involved in the abscisic acid responsiveness	Phytohormone	Abscisic acid
TrPHT2	ABRE	ACGTG	1186	5	+	cis-acting element involved in the abscisic acid responsiveness	Phytohormone	Abscisic acid
TrPHT2	ABRE	ACGTG	1611	5	-	cis-acting element involved in the abscisic acid responsiveness	Phytohormone	Abscisic acid
TrPHT2	ABRE	ACGTG	1665	5	+	cis-acting element involved in the abscisic acid responsiveness	Phytohormone	Abscisic acid
TrPHT2	TGA-element	AACGAC	1690	6	-	auxin-responsive element	Phytohormone	Auxin
TrPHT2	AuxRR-core	GGTCCAT	467	7	-	cis-acting regulatory element involved in auxin responsiveness	Phytohormone	Auxin
TrPHT2	GARE-motif	TCTGTTG	1731	7	-	gibberellin-responsive element	Phytohormone	Gibberellin
TrPHT2	P-box	CCTTTTG	1225	7	+	gibberellin-responsive element	Phytohormone	Gibberellin
TrPHT2	CGTCA-motif	CGTCA	779	5	-	cis-acting regulatory element involved in the MeJA-responsiveness	Phytohormone	MeJA
TrPHT2	CGTCA-motif	CGTCA	1772	5	+	cis-acting regulatory element involved in the MeJA-responsiveness	Phytohormone	MeJA
TrPHT2	TGACG-motif	TGACG	779	5	+	cis-acting regulatory element involved in the MeJA-responsiveness	Phytohormone	MeJA
TrPHT2	TGACG-motif	TGACG	1772	5	-	cis-acting regulatory element involved in the MeJA-responsiveness	Phytohormone	MeJA
TrPHT2	O2-site	GATGATGTGG	423	9	+	cis-acting regulatory element involved in zein metabolism regulation	Phytohormone	Zein
TrPHT2	CCAAT-box	CAACGG	260	6	+	MYBHv1 binding site	TF	MYB Binding Site
TrPHT2	CCAAT-box	CAACGG	1881	6	-	MYBHv1 binding site	TF	MYB Binding Site
TrPHT2	CCAAT-box	CAACGG	1956	6	+	MYBHv1 binding site	TF	MYB Binding Site
TrPHT2	MBS	CAACTG	24	6	-	MYB binding site involved in drought-inducibility	TF	MYB Binding Site
TrPHT2	MBS	CAACTG	1265	6	-	MYB binding site involved in drought-inducibility	TF	MYB Binding Site
TrPHT2	CAT-box	GCCACT	1411	6	-	cis-acting regulatory element related to meristem expression	Tissue	Meristem
TrPHT2	CAT-box	GCCACT	1474	6	+	cis-acting regulatory element related to meristem expression	Tissue	Meristem
TrPHT2	CAT-box	GCCACT	1658	6	-	cis-acting regulatory element related to meristem expression	Tissue	Meristem
TrPHT2	RY-element	CATGCATG	1907	8	-	cis-acting regulatory element involved in seed-specific regulation	Tissue	Seed
TrPHT20	ARE	AAACCA	1392	6	+	cis-acting regulatory element essential for the anaerobic induction	Environment	Anaerobic
TrPHT20	GC-motif	CCCCCG	452	6	-	enhancer-like element involved in anoxic specific inducibility	Environment	Anoxic
TrPHT20	GATA-motif	AAGGATAAGG	771	9	-	part of a light responsive element	Environment	Light
TrPHT20	GATA-motif	GATAGGG	1640	7	+	part of a light responsive element	Environment	Light
TrPHT20	G-box	CACGTC	411	6	-	cis-acting regulatory element involved in light responsiveness	Environment	Light
TrPHT20	TCCC-motif	TCTCCCT	1894	7	+	part of a light responsive element	Environment	Light
TrPHT20	ABRE	ACGTG	412	5	+	cis-acting element involved in the abscisic acid responsiveness	Phytohormone	Abscisic acid
TrPHT20	ABRE	GCCGCGTGGC	1738	9	+	cis-acting element involved in the abscisic acid responsiveness	Phytohormone	Abscisic acid
TrPHT20	GARE-motif	TCTGTTG	1959	7	-	gibberellin-responsive element	Phytohormone	Gibberellin
TrPHT20	CGTCA-motif	CGTCA	96	5	+	cis-acting regulatory element involved in the MeJA-responsiveness	Phytohormone	MeJA
TrPHT20	CGTCA-motif	CGTCA	502	5	-	cis-acting regulatory element involved in the MeJA-responsiveness	Phytohormone	MeJA
TrPHT20	TGACG-motif	TGACG	96	5	-	cis-acting regulatory element involved in the MeJA-responsiveness	Phytohormone	MeJA
TrPHT20	TGACG-motif	TGACG	502	5	+	cis-acting regulatory element involved in the MeJA-responsiveness	Phytohormone	MeJA
TrPHT20	TCA-element	CCATCTTTTT	1080	9	+	cis-acting element involved in salicylic acid responsiveness	Phytohormone	Salicylic acid
TrPHT20	TCA-element	CCATCTTTTT	1537	9	-	cis-acting element involved in salicylic acid responsiveness	Phytohormone	Salicylic acid
TrPHT20	O2-site	GATGATGTGG	637	9	+	cis-acting regulatory element involved in zein metabolism regulation	Phytohormone	Zein
TrPHT20	CCAAT-box	CAACGG	740	6	+	MYBHv1 binding site	TF	MYB Binding Site
TrPHT20	MBS	CAACTG	1234	6	-	MYB binding site involved in drought-inducibility	TF	MYB Binding Site
TrPHT21	ARE	AAACCA	1073	6	-	cis-acting regulatory element essential for the anaerobic induction	Environment	Anaerobic
TrPHT21	GATA-motif	GATAGGG	588	7	-	part of a light responsive element	Environment	Light
TrPHT21	GATA-motif	GATAGGA	808	7	-	part of a light responsive element	Environment	Light
TrPHT21	I-box	GATAAGGGT	427	9	-	part of a light responsive element	Environment	Light
TrPHT21	I-box	AGATAAGG	429	8	-	part of a light responsive element	Environment	Light
TrPHT21	I-box	cGATAAGGCG	992	9	-	part of a light responsive element	Environment	Light
TrPHT21	G-Box	CACGTT	56	6	-	cis-acting regulatory element involved in light responsiveness	Environment	Light
TrPHT21	G-Box	TCCACATGGCA	146	10	-	cis-acting regulatory element involved in light responsiveness	Environment	Light
TrPHT21	G-Box	CACGTT	1715	6	+	cis-acting regulatory element involved in light responsiveness	Environment	Light
TrPHT21	TCT-motif	TCTTAC	168	6	-	part of a light responsive element	Environment	Light
TrPHT21	G-box	CACGAC	917	6	-	cis-acting regulatory element involved in light responsiveness	Environment	Light
TrPHT21	LTR	CCGAAA	389	6	-	cis-acting element involved in low-temperature responsiveness	Environment	Low-temperature
TrPHT21	LTR	CCGAAA	622	6	-	cis-acting element involved in low-temperature responsiveness	Environment	Low-temperature
TrPHT21	LTR	CCGAAA	1662	6	+	cis-acting element involved in low-temperature responsiveness	Environment	Low-temperature
TrPHT21	TC-rich repeats	GTTTTCTTAC	242	9	-	cis-acting element involved in defense and stress responsiveness	Environment	Mixed stress
TrPHT21	ABRE	ACGTG	57	5	+	cis-acting element involved in the abscisic acid responsiveness	Phytohormone	Abscisic acid
TrPHT21	ABRE	ACGTG	1715	5	-	cis-acting element involved in the abscisic acid responsiveness	Phytohormone	Abscisic acid
TrPHT21	TGA-element	AACGAC	1061	6	-	auxin-responsive element	Phytohormone	Auxin
TrPHT21	P-box	CCTTTTG	1836	7	-	gibberellin-responsive element	Phytohormone	Gibberellin
TrPHT21	CGTCA-motif	CGTCA	60	5	-	cis-acting regulatory element involved in the MeJA-responsiveness	Phytohormone	MeJA
TrPHT21	CGTCA-motif	CGTCA	699	5	+	cis-acting regulatory element involved in the MeJA-responsiveness	Phytohormone	MeJA
TrPHT21	CGTCA-motif	CGTCA	873	5	+	cis-acting regulatory element involved in the MeJA-responsiveness	Phytohormone	MeJA
TrPHT21	CGTCA-motif	CGTCA	913	5	-	cis-acting regulatory element involved in the MeJA-responsiveness	Phytohormone	MeJA
TrPHT21	CGTCA-motif	CGTCA	1937	5	+	cis-acting regulatory element involved in the MeJA-responsiveness	Phytohormone	MeJA
TrPHT21	TGACG-motif	TGACG	60	5	+	cis-acting regulatory element involved in the MeJA-responsiveness	Phytohormone	MeJA
TrPHT21	TGACG-motif	TGACG	699	5	-	cis-acting regulatory element involved in the MeJA-responsiveness	Phytohormone	MeJA
TrPHT21	TGACG-motif	TGACG	873	5	-	cis-acting regulatory element involved in the MeJA-responsiveness	Phytohormone	MeJA
TrPHT21	TGACG-motif	TGACG	913	5	+	cis-acting regulatory element involved in the MeJA-responsiveness	Phytohormone	MeJA
TrPHT21	TGACG-motif	TGACG	1937	5	-	cis-acting regulatory element involved in the MeJA-responsiveness	Phytohormone	MeJA
TrPHT21	O2-site	GATGA(C/T)(A/G)TG(A/G)	1395	8	+	cis-acting regulatory element involved in zein metabolism regulation	Phytohormone	Zein
TrPHT21	MBS	CAACTG	405	6	+	MYB binding site involved in drought-inducibility	TF	MYB Binding Site
TrPHT21	CAT-box	GCCACT	1637	6	+	cis-acting regulatory element related to meristem expression	Tissue	Meristem
TrPHT22	ARE	AAACCA	950	6	+	cis-acting regulatory element essential for the anaerobic induction	Environment	Anaerobic
TrPHT22	GATA-motif	GATAGGG	545	7	-	part of a light responsive element	Environment	Light
TrPHT22	G-Box	CACGTG	569	6	+	cis-acting regulatory element involved in light responsiveness	Environment	Light
TrPHT22	G-Box	CACGTG	982	6	+	cis-acting regulatory element involved in light responsiveness	Environment	Light
TrPHT22	G-Box	CACGTG	1330	6	-	cis-acting regulatory element involved in light responsiveness	Environment	Light
TrPHT22	G-Box	CACGTT	1671	6	+	cis-acting regulatory element involved in light responsiveness	Environment	Light
TrPHT22	G-Box	CACGTG	1713	6	-	cis-acting regulatory element involved in light responsiveness	Environment	Light
TrPHT22	I-box	AGATAAGG	849	8	-	part of a light responsive element	Environment	Light
TrPHT22	G-box	TACGTG	153	6	+	cis-acting regulatory element involved in light responsiveness	Environment	Light
TrPHT22	G-box	CACGAC	288	6	+	cis-acting regulatory element involved in light responsiveness	Environment	Light
TrPHT22	G-box	CACGAC	502	6	+	cis-acting regulatory element involved in light responsiveness	Environment	Light
TrPHT22	G-box	CACGTC	551	6	+	cis-acting regulatory element involved in light responsiveness	Environment	Light
TrPHT22	G-box	CACGTG	569	6	+	cis-acting regulatory element involved in light responsiveness	Environment	Light
TrPHT22	G-box	CACGAC	972	6	+	cis-acting regulatory element involved in light responsiveness	Environment	Light
TrPHT22	G-box	CACGTG	982	6	+	cis-acting regulatory element involved in light responsiveness	Environment	Light
TrPHT22	G-box	CACGTG	1330	6	-	cis-acting regulatory element involved in light responsiveness	Environment	Light
TrPHT22	G-box	CACGTG	1713	6	-	cis-acting regulatory element involved in light responsiveness	Environment	Light
TrPHT22	ACE	CTAACGTATT	266	9	+	cis-acting element involved in light responsiveness	Environment	Light
TrPHT22	TCCC-motif	TCTCCCT	542	7	+	part of a light responsive element	Environment	Light
TrPHT22	GTGGC-motif	CAGCGTGTGGC	394	10	+	part of a light responsive element	Environment	Light
TrPHT22	TC-rich repeats	GTTTTCTTAC	1973	9	-	cis-acting element involved in defense and stress responsiveness	Environment	Mixed stress
TrPHT22	ABRE	CGTACGTGCA	151	9	+	cis-acting element involved in the abscisic acid responsiveness	Phytohormone	Abscisic acid
TrPHT22	ABRE	ACGTG	154	5	+	cis-acting element involved in the abscisic acid responsiveness	Phytohormone	Abscisic acid
TrPHT22	ABRE	ACGTG	551	5	-	cis-acting element involved in the abscisic acid responsiveness	Phytohormone	Abscisic acid
TrPHT22	ABRE	CACGTG	569	6	+	cis-acting element involved in the abscisic acid responsiveness	Phytohormone	Abscisic acid
TrPHT22	ABRE	ACGTG	570	5	+	cis-acting element involved in the abscisic acid responsiveness	Phytohormone	Abscisic acid
TrPHT22	ABRE	CACGTG	982	6	+	cis-acting element involved in the abscisic acid responsiveness	Phytohormone	Abscisic acid
TrPHT22	ABRE	ACGTG	983	5	+	cis-acting element involved in the abscisic acid responsiveness	Phytohormone	Abscisic acid
TrPHT22	ABRE	CGCACGTGTC	1328	9	-	cis-acting element involved in the abscisic acid responsiveness	Phytohormone	Abscisic acid
TrPHT22	ABRE	CACGTG	1330	6	-	cis-acting element involved in the abscisic acid responsiveness	Phytohormone	Abscisic acid
TrPHT22	ABRE	ACGTG	1331	5	+	cis-acting element involved in the abscisic acid responsiveness	Phytohormone	Abscisic acid
TrPHT22	ABRE	ACGTG	1671	5	-	cis-acting element involved in the abscisic acid responsiveness	Phytohormone	Abscisic acid
TrPHT22	ABRE	CGCACGTGTC	1711	9	+	cis-acting element involved in the abscisic acid responsiveness	Phytohormone	Abscisic acid
TrPHT22	ABRE	CACGTG	1713	6	-	cis-acting element involved in the abscisic acid responsiveness	Phytohormone	Abscisic acid
TrPHT22	ABRE	ACGTG	1714	5	+	cis-acting element involved in the abscisic acid responsiveness	Phytohormone	Abscisic acid
TrPHT22	TGA-element	AACGAC	1039	6	+	auxin-responsive element	Phytohormone	Auxin
TrPHT22	TATC-box	TATCCCA	943	7	+	cis-acting element involved in gibberellin-responsiveness	Phytohormone	gibberellin
TrPHT22	CGTCA-motif	CGTCA	3	5	-	cis-acting regulatory element involved in the MeJA-responsiveness	Phytohormone	MeJA
TrPHT22	CGTCA-motif	CGTCA	362	5	+	cis-acting regulatory element involved in the MeJA-responsiveness	Phytohormone	MeJA
TrPHT22	CGTCA-motif	CGTCA	869	5	+	cis-acting regulatory element involved in the MeJA-responsiveness	Phytohormone	MeJA
TrPHT22	CGTCA-motif	CGTCA	1881	5	-	cis-acting regulatory element involved in the MeJA-responsiveness	Phytohormone	MeJA
TrPHT22	CGTCA-motif	CGTCA	1994	5	+	cis-acting regulatory element involved in the MeJA-responsiveness	Phytohormone	MeJA
TrPHT22	TGACG-motif	TGACG	3	5	+	cis-acting regulatory element involved in the MeJA-responsiveness	Phytohormone	MeJA
TrPHT22	TGACG-motif	TGACG	362	5	-	cis-acting regulatory element involved in the MeJA-responsiveness	Phytohormone	MeJA
TrPHT22	TGACG-motif	TGACG	869	5	-	cis-acting regulatory element involved in the MeJA-responsiveness	Phytohormone	MeJA
TrPHT22	TGACG-motif	TGACG	1881	5	+	cis-acting regulatory element involved in the MeJA-responsiveness	Phytohormone	MeJA
TrPHT22	TGACG-motif	TGACG	1994	5	-	cis-acting regulatory element involved in the MeJA-responsiveness	Phytohormone	MeJA
TrPHT22	TCA-element	CCATCTTTTT	1911	9	-	cis-acting element involved in salicylic acid responsiveness	Phytohormone	Salicylic acid
TrPHT22	CCAAT-box	CAACGG	344	6	-	MYBHv1 binding site	TF	MYB Binding Site
TrPHT22	CCAAT-box	CAACGG	404	6	+	MYBHv1 binding site	TF	MYB Binding Site
TrPHT22	CCAAT-box	CAACGG	1362	6	+	MYBHv1 binding site	TF	MYB Binding Site
TrPHT22	MBS	CAACTG	1230	6	+	MYB binding site involved in drought-inducibility	TF	MYB Binding Site
TrPHT22	MBS	CAACTG	1811	6	+	MYB binding site involved in drought-inducibility	TF	MYB Binding Site
TrPHT22	CAT-box	GCCACT	262	6	+	cis-acting regulatory element related to meristem expression	Tissue	Meristem
TrPHT3	GC-motif	CCCCCG	55	6	-	enhancer-like element involved in anoxic specific inducibility	Environment	Anoxic
TrPHT3	GC-motif	CCCCCG	1354	6	-	enhancer-like element involved in anoxic specific inducibility	Environment	Anoxic
TrPHT3	GTGGC-motif	CAGCGTGTGGC	233	10	+	part of a light responsive element	Environment	Light
TrPHT3	TCCC-motif	TCTCCCT	1530	7	-	part of a light responsive element	Environment	Light
TrPHT3	I-box	cGATAAGGCG	1634	9	+	part of a light responsive element	Environment	Light
TrPHT3	G-Box	CACGTG	1538	6	-	cis-acting regulatory element involved in light responsiveness	Environment	Light
TrPHT3	G-Box	CACGTT	1771	6	+	cis-acting regulatory element involved in light responsiveness	Environment	Light
TrPHT3	Sp1	GGGCGG	52	6	+	light responsive element	Environment	Light
TrPHT3	Sp1	GGGCGG	1351	6	+	light responsive element	Environment	Light
TrPHT3	Sp1	GGGCGG	1971	6	-	light responsive element	Environment	Light
TrPHT3	G-box	CACGTG	1538	6	-	cis-acting regulatory element involved in light responsiveness	Environment	Light
TrPHT3	G-box	CAGACGTGGCA	1797	10	+	cis-acting regulatory element involved in light responsiveness	Environment	Light
TrPHT3	LTR	CCGAAA	1070	6	-	cis-acting element involved in low-temperature responsiveness	Environment	Low-temperature
TrPHT3	LTR	CCGAAA	1442	6	+	cis-acting element involved in low-temperature responsiveness	Environment	Low-temperature
TrPHT3	TC-rich repeats	ATTCTCTAAC	478	9	-	cis-acting element involved in defense and stress responsiveness	Environment	Mixed stress
TrPHT3	ABRE	GACACGTGGC	159	9	+	cis-acting element involved in the abscisic acid responsiveness	Phytohormone	Abscisic acid
TrPHT3	ABRE	CACGTG	1538	6	-	cis-acting element involved in the abscisic acid responsiveness	Phytohormone	Abscisic acid
TrPHT3	ABRE	ACGTG	1539	5	+	cis-acting element involved in the abscisic acid responsiveness	Phytohormone	Abscisic acid
TrPHT3	ABRE	ACGTG	1771	5	-	cis-acting element involved in the abscisic acid responsiveness	Phytohormone	Abscisic acid
TrPHT3	TGACG-motif	TGACG	264	5	+	cis-acting regulatory element involved in the MeJA-responsiveness	Phytohormone	MeJA
TrPHT3	TGACG-motif	TGACG	487	5	+	cis-acting regulatory element involved in the MeJA-responsiveness	Phytohormone	MeJA
TrPHT3	TGACG-motif	TGACG	1224	5	+	cis-acting regulatory element involved in the MeJA-responsiveness	Phytohormone	MeJA
TrPHT3	TGACG-motif	TGACG	1333	5	-	cis-acting regulatory element involved in the MeJA-responsiveness	Phytohormone	MeJA
TrPHT3	CGTCA-motif	CGTCA	264	5	-	cis-acting regulatory element involved in the MeJA-responsiveness	Phytohormone	MeJA
TrPHT3	CGTCA-motif	CGTCA	487	5	-	cis-acting regulatory element involved in the MeJA-responsiveness	Phytohormone	MeJA
TrPHT3	CGTCA-motif	CGTCA	1224	5	-	cis-acting regulatory element involved in the MeJA-responsiveness	Phytohormone	MeJA
TrPHT3	CGTCA-motif	CGTCA	1333	5	+	cis-acting regulatory element involved in the MeJA-responsiveness	Phytohormone	MeJA
TrPHT3	O2-site	GATGA(C/T)(A/G)TG(A/G)	845	8	-	cis-acting regulatory element involved in zein metabolism regulation	Phytohormone	Zein
TrPHT3	MBS	CAACTG	152	6	-	MYB binding site involved in drought-inducibility	TF	MYB Binding Site
TrPHT3	MBS	CAACTG	292	6	+	MYB binding site involved in drought-inducibility	TF	MYB Binding Site
TrPHT3	CAT-box	GCCACT	1661	6	-	cis-acting regulatory element related to meristem expression	Tissue	Meristem
TrPHT4	ARE	AAACCA	73	6	-	cis-acting regulatory element essential for the anaerobic induction	Environment	Anaerobic
TrPHT4	GC-motif	CCCCCG	514	6	-	enhancer-like element involved in anoxic specific inducibility	Environment	Anoxic
TrPHT4	AT-rich sequence	TAAAATACT	371	9	-	element for maximal elicitor-mediated activation (2copies)	Environment	Elicitor
TrPHT4	G-box	CACGAC	646	6	-	cis-acting regulatory element involved in light responsiveness	Environment	Light
TrPHT4	G-box	CACGAC	661	6	+	cis-acting regulatory element involved in light responsiveness	Environment	Light
TrPHT4	G-box	CACGTC	731	6	+	cis-acting regulatory element involved in light responsiveness	Environment	Light
TrPHT4	G-box	TACGTG	1875	6	-	cis-acting regulatory element involved in light responsiveness	Environment	Light
TrPHT4	LTR	CCGAAA	433	6	+	cis-acting element involved in low-temperature responsiveness	Environment	Low-temperature
TrPHT4	LTR	CCGAAA	446	6	-	cis-acting element involved in low-temperature responsiveness	Environment	Low-temperature
TrPHT4	ABRE	ACGTG	731	5	-	cis-acting element involved in the abscisic acid responsiveness	Phytohormone	Abscisic acid
TrPHT4	ABRE	ACGTG	1875	5	-	cis-acting element involved in the abscisic acid responsiveness	Phytohormone	Abscisic acid
TrPHT4	TGA-box	TGACGTAA	1906	8	-	part of an auxin-responsive element	Phytohormone	Auxin
TrPHT4	TGA-element	AACGAC	22	6	+	auxin-responsive element	Phytohormone	Auxin
TrPHT4	AuxRR-core	GGTCCAT	1423	7	-	cis-acting regulatory element involved in auxin responsiveness	Phytohormone	Auxin
TrPHT4	P-box	CCTTTTG	899	7	+	gibberellin-responsive element	Phytohormone	Gibberellin
TrPHT4	P-box	CCTTTTG	1450	7	+	gibberellin-responsive element	Phytohormone	Gibberellin
TrPHT4	CGTCA-motif	CGTCA	261	5	-	cis-acting regulatory element involved in the MeJA-responsiveness	Phytohormone	MeJA
TrPHT4	CGTCA-motif	CGTCA	1046	5	-	cis-acting regulatory element involved in the MeJA-responsiveness	Phytohormone	MeJA
TrPHT4	CGTCA-motif	CGTCA	1909	5	+	cis-acting regulatory element involved in the MeJA-responsiveness	Phytohormone	MeJA
TrPHT4	TGACG-motif	TGACG	261	5	+	cis-acting regulatory element involved in the MeJA-responsiveness	Phytohormone	MeJA
TrPHT4	TGACG-motif	TGACG	1046	5	+	cis-acting regulatory element involved in the MeJA-responsiveness	Phytohormone	MeJA
TrPHT4	TGACG-motif	TGACG	1909	5	-	cis-acting regulatory element involved in the MeJA-responsiveness	Phytohormone	MeJA
TrPHT4	CCAAT-box	CAACGG	1233	6	+	MYBHv1 binding site	TF	MYB Binding Site
TrPHT4	GCN4_motif	TGAGTCA	1965	7	+	cis-regulatory element involved in endosperm expression	Tissue	Endosperm
TrPHT4	CAT-box	GCCACT	502	6	-	cis-acting regulatory element related to meristem expression	Tissue	Meristem
TrPHT4	CAT-box	GCCACT	892	6	-	cis-acting regulatory element related to meristem expression	Tissue	Meristem
TrPHT5	ARE	AAACCA	1300	6	+	cis-acting regulatory element essential for the anaerobic induction	Environment	Anaerobic
TrPHT5	GT1-motif	GGTTAA	128	6	+	light responsive element	Environment	Light
TrPHT5	GT1-motif	GTGTGTGAA	1586	9	-	light responsive element	Environment	Light
TrPHT5	GT1-motif	GGTTAA	1701	6	-	light responsive element	Environment	Light
TrPHT5	G-box	GCCACGTGGA	828	9	-	cis-acting regulatory element involved in light responsiveness	Environment	Light
TrPHT5	G-box	CACGTG	830	6	+	cis-acting regulatory element involved in light responsiveness	Environment	Light
TrPHT5	G-box	CACGAC	1009	6	-	cis-acting regulatory element involved in light responsiveness	Environment	Light
TrPHT5	G-box	CACGTG	1083	6	-	cis-acting regulatory element involved in light responsiveness	Environment	Light
TrPHT5	G-box	CACGTC	1345	6	-	cis-acting regulatory element involved in light responsiveness	Environment	Light
TrPHT5	G-box	CACGTG	1404	6	-	cis-acting regulatory element involved in light responsiveness	Environment	Light
TrPHT5	3-AF1 binding site	TAAGAGAGGAA	1746	10	+	light responsive element	Environment	Light
TrPHT5	GATA-motif	GATAGGA	557	7	-	part of a light responsive element	Environment	Light
TrPHT5	I-box	GTATAAGGCC	286	9	+	part of a light responsive element	Environment	Light
TrPHT5	G-Box	CACGTG	830	6	+	cis-acting regulatory element involved in light responsiveness	Environment	Light
TrPHT5	G-Box	CACGTG	1083	6	-	cis-acting regulatory element involved in light responsiveness	Environment	Light
TrPHT5	G-Box	CACGTG	1404	6	-	cis-acting regulatory element involved in light responsiveness	Environment	Light
TrPHT5	Box II	CCACGTGGC	829	9	+	part of a light responsive element	Environment	Light
TrPHT5	ABRE	CACGTG	830	6	+	cis-acting element involved in the abscisic acid responsiveness	Phytohormone	Abscisic acid
TrPHT5	ABRE	ACGTG	831	5	+	cis-acting element involved in the abscisic acid responsiveness	Phytohormone	Abscisic acid
TrPHT5	ABRE	CACGTG	1083	6	-	cis-acting element involved in the abscisic acid responsiveness	Phytohormone	Abscisic acid
TrPHT5	ABRE	ACGTG	1084	5	+	cis-acting element involved in the abscisic acid responsiveness	Phytohormone	Abscisic acid
TrPHT5	ABRE	ACGTG	1346	5	+	cis-acting element involved in the abscisic acid responsiveness	Phytohormone	Abscisic acid
TrPHT5	ABRE	CACGTG	1404	6	-	cis-acting element involved in the abscisic acid responsiveness	Phytohormone	Abscisic acid
TrPHT5	ABRE	ACGTG	1405	5	+	cis-acting element involved in the abscisic acid responsiveness	Phytohormone	Abscisic acid
TrPHT5	GARE-motif	TCTGTTG	502	7	-	gibberellin-responsive element	Phytohormone	Gibberellin
TrPHT5	CGTCA-motif	CGTCA	379	5	+	cis-acting regulatory element involved in the MeJA-responsiveness	Phytohormone	MeJA
TrPHT5	TGACG-motif	TGACG	379	5	-	cis-acting regulatory element involved in the MeJA-responsiveness	Phytohormone	MeJA
TrPHT5	circadian	CAAAGATATC	1424	9	+	cis-acting regulatory element involved in circadian control	Stage	Circadian
TrPHT5	MBS	CAACTG	299	6	-	MYB binding site involved in drought-inducibility	TF	MYB Binding Site
TrPHT5	MBS	CAACTG	1796	6	+	MYB binding site involved in drought-inducibility	TF	MYB Binding Site
TrPHT5	CCAAT-box	CAACGG	1775	6	-	MYBHv1 binding site	TF	MYB Binding Site
TrPHT5	MRE	AACCTAA	590	7	+	MYB binding site involved in light responsiveness	TF	MYB Binding Site
TrPHT5	GCN4_motif	TGAGTCA	951	7	-	cis-regulatory element involved in endosperm expression	Tissue	Endosperm
TrPHT6	ARE	AAACCA	1709	6	-	cis-acting regulatory element essential for the anaerobic induction	Environment	Anaerobic
TrPHT6	GC-motif	CCCCCG	882	6	-	enhancer-like element involved in anoxic specific inducibility	Environment	Anoxic
TrPHT6	GC-motif	CCCCCG	1536	6	+	enhancer-like element involved in anoxic specific inducibility	Environment	Anoxic
TrPHT6	G-box	CACGAC	27	6	-	cis-acting regulatory element involved in light responsiveness	Environment	Light
TrPHT6	G-box	TACGTG	33	6	+	cis-acting regulatory element involved in light responsiveness	Environment	Light
TrPHT6	G-box	CACGTG	377	6	+	cis-acting regulatory element involved in light responsiveness	Environment	Light
TrPHT6	G-box	TACGTG	1017	6	+	cis-acting regulatory element involved in light responsiveness	Environment	Light
TrPHT6	G-box	TACGTG	1024	6	-	cis-acting regulatory element involved in light responsiveness	Environment	Light
TrPHT6	G-box	CACGAC	1400	6	-	cis-acting regulatory element involved in light responsiveness	Environment	Light
TrPHT6	G-box	CACGAC	1588	6	+	cis-acting regulatory element involved in light responsiveness	Environment	Light
TrPHT6	G-box	TACGTG	1649	6	+	cis-acting regulatory element involved in light responsiveness	Environment	Light
TrPHT6	ATC-motif	TGCTATCCG	639	9	+	part of a conserved DNA module involved in light responsiveness	Environment	Light
TrPHT6	G-Box	CACGTG	377	6	+	cis-acting regulatory element involved in light responsiveness	Environment	Light
TrPHT6	G-Box	CACGTT	557	6	+	cis-acting regulatory element involved in light responsiveness	Environment	Light
TrPHT6	G-Box	CACGTT	684	6	-	cis-acting regulatory element involved in light responsiveness	Environment	Light
TrPHT6	G-Box	CACGTT	1348	6	-	cis-acting regulatory element involved in light responsiveness	Environment	Light
TrPHT6	G-Box	CACGTT	1729	6	+	cis-acting regulatory element involved in light responsiveness	Environment	Light
TrPHT6	Sp1	GGGCGG	489	6	+	light responsive element	Environment	Light
TrPHT6	TCCC-motif	TCTCCCT	1248	7	-	part of a light responsive element	Environment	Light
TrPHT6	LTR	CCGAAA	463	6	-	cis-acting element involved in low-temperature responsiveness	Environment	Low-temperature
TrPHT6	LTR	CCGAAA	512	6	+	cis-acting element involved in low-temperature responsiveness	Environment	Low-temperature
TrPHT6	ABRE	ACGTG	34	5	+	cis-acting element involved in the abscisic acid responsiveness	Phytohormone	Abscisic acid
TrPHT6	ABRE	CACGTG	377	6	+	cis-acting element involved in the abscisic acid responsiveness	Phytohormone	Abscisic acid
TrPHT6	ABRE	ACGTG	378	5	+	cis-acting element involved in the abscisic acid responsiveness	Phytohormone	Abscisic acid
TrPHT6	ABRE	ACGTG	557	5	-	cis-acting element involved in the abscisic acid responsiveness	Phytohormone	Abscisic acid
TrPHT6	ABRE	ACGTG	685	5	+	cis-acting element involved in the abscisic acid responsiveness	Phytohormone	Abscisic acid
TrPHT6	ABRE	GCAACGTGTC	734	9	-	cis-acting element involved in the abscisic acid responsiveness	Phytohormone	Abscisic acid
TrPHT6	ABRE	TACGTGTC	1017	8	+	cis-acting element involved in the abscisic acid responsiveness	Phytohormone	Abscisic acid
TrPHT6	ABRE	ACGTG	1018	5	+	cis-acting element involved in the abscisic acid responsiveness	Phytohormone	Abscisic acid
TrPHT6	ABRE	ACGTG	1024	5	-	cis-acting element involved in the abscisic acid responsiveness	Phytohormone	Abscisic acid
TrPHT6	ABRE	ACGTG	1349	5	+	cis-acting element involved in the abscisic acid responsiveness	Phytohormone	Abscisic acid
TrPHT6	ABRE	ACGTG	1650	5	+	cis-acting element involved in the abscisic acid responsiveness	Phytohormone	Abscisic acid
TrPHT6	ABRE	ACGTG	1729	5	-	cis-acting element involved in the abscisic acid responsiveness	Phytohormone	Abscisic acid
TrPHT6	TGA-element	AACGAC	258	6	+	auxin-responsive element	Phytohormone	Auxin
TrPHT6	TGA-element	AACGAC	1583	6	+	auxin-responsive element	Phytohormone	Auxin
TrPHT6	CGTCA-motif	CGTCA	63	5	+	cis-acting regulatory element involved in the MeJA-responsiveness	Phytohormone	MeJA
TrPHT6	CGTCA-motif	CGTCA	606	5	-	cis-acting regulatory element involved in the MeJA-responsiveness	Phytohormone	MeJA
TrPHT6	TGACG-motif	TGACG	63	5	-	cis-acting regulatory element involved in the MeJA-responsiveness	Phytohormone	MeJA
TrPHT6	TGACG-motif	TGACG	606	5	+	cis-acting regulatory element involved in the MeJA-responsiveness	Phytohormone	MeJA
TrPHT6	TCA-element	TCAGAAGAGG	1890	9	-	cis-acting element involved in salicylic acid responsiveness	Phytohormone	Salicylic acid
TrPHT6	O2-site	GATGATGTGG	1006	9	+	cis-acting regulatory element involved in zein metabolism regulation	Phytohormone	Zein
TrPHT6	MBS	CAACTG	1264	6	+	MYB binding site involved in drought-inducibility	TF	MYB Binding Site
TrPHT6	CAT-box	GCCACT	289	6	+	cis-acting regulatory element related to meristem expression	Tissue	Meristem
TrPHT6	CAT-box	GCCACT	797	6	+	cis-acting regulatory element related to meristem expression	Tissue	Meristem
TrPHT6	motif I	gGTACGTGGCG	1149	10	-	cis-acting regulatory element root specific	Tissue	Root
TrPHT7	Box 4	ATTAAT	687	6	+	part of a conserved DNA module involved in light responsiveness	Environment	Light
TrPHT7	TCCC-motif	TCTCCCT	144	7	+	part of a light responsive element	Environment	Light
TrPHT7	TCCC-motif	TCTCCCT	1262	7	+	part of a light responsive element	Environment	Light
TrPHT7	ACE	GACACGTATG	136	9	-	cis-acting element involved in light responsiveness	Environment	Light
TrPHT7	G-box	CACGAC	953	6	-	cis-acting regulatory element involved in light responsiveness	Environment	Light
TrPHT7	G-box	CACGTC	1297	6	+	cis-acting regulatory element involved in light responsiveness	Environment	Light
TrPHT7	G-box	CACGTG	1414	6	-	cis-acting regulatory element involved in light responsiveness	Environment	Light
TrPHT7	G-box	CACGTG	1565	6	-	cis-acting regulatory element involved in light responsiveness	Environment	Light
TrPHT7	G-box	CACGTG	1773	6	-	cis-acting regulatory element involved in light responsiveness	Environment	Light
TrPHT7	Sp1	GGGCGG	1175	6	-	light responsive element	Environment	Light
TrPHT7	I-box	GTATAAGGCC	1861	9	+	part of a light responsive element	Environment	Light
TrPHT7	TCT-motif	TCTTAC	151	6	+	part of a light responsive element	Environment	Light
TrPHT7	TCT-motif	TCTTAC	1185	6	+	part of a light responsive element	Environment	Light
TrPHT7	G-Box	CACGTG	1414	6	-	cis-acting regulatory element involved in light responsiveness	Environment	Light
TrPHT7	G-Box	CACGTG	1565	6	-	cis-acting regulatory element involved in light responsiveness	Environment	Light
TrPHT7	G-Box	CACGTG	1773	6	-	cis-acting regulatory element involved in light responsiveness	Environment	Light
TrPHT7	LTR	CCGAAA	1349	6	+	cis-acting element involved in low-temperature responsiveness	Environment	Low-temperature
TrPHT7	ABRE	ACGTG	1297	5	-	cis-acting element involved in the abscisic acid responsiveness	Phytohormone	Abscisic acid
TrPHT7	ABRE	CACGTG	1414	6	-	cis-acting element involved in the abscisic acid responsiveness	Phytohormone	Abscisic acid
TrPHT7	ABRE	ACGTG	1415	5	+	cis-acting element involved in the abscisic acid responsiveness	Phytohormone	Abscisic acid
TrPHT7	ABRE	CACGTG	1565	6	-	cis-acting element involved in the abscisic acid responsiveness	Phytohormone	Abscisic acid
TrPHT7	ABRE	ACGTG	1566	5	+	cis-acting element involved in the abscisic acid responsiveness	Phytohormone	Abscisic acid
TrPHT7	ABRE	CACGTG	1773	6	-	cis-acting element involved in the abscisic acid responsiveness	Phytohormone	Abscisic acid
TrPHT7	ABRE	ACGTG	1774	5	+	cis-acting element involved in the abscisic acid responsiveness	Phytohormone	Abscisic acid
TrPHT7	TGA-element	AACGAC	1100	6	+	auxin-responsive element	Phytohormone	Auxin
TrPHT7	O2-site	GATGATGTGG	1626	9	+	cis-acting regulatory element involved in zein metabolism regulation	Phytohormone	Zein
TrPHT7	MBS	CAACTG	940	6	-	MYB binding site involved in drought-inducibility	TF	MYB Binding Site
TrPHT7	CCAAT-box	CAACGG	512	6	-	MYBHv1 binding site	TF	MYB Binding Site
TrPHT7	CAT-box	GCCACT	164	6	-	cis-acting regulatory element related to meristem expression	Tissue	Meristem
TrPHT7	CAT-box	GCCACT	172	6	+	cis-acting regulatory element related to meristem expression	Tissue	Meristem
TrPHT7	CAT-box	GCCACT	1336	6	-	cis-acting regulatory element related to meristem expression	Tissue	Meristem
TrPHT8	ARE	AAACCA	316	6	+	cis-acting regulatory element essential for the anaerobic induction	Environment	Anaerobic
TrPHT8	ARE	AAACCA	1304	6	+	cis-acting regulatory element essential for the anaerobic induction	Environment	Anaerobic
TrPHT8	G-box	TAACACGTAG	498	9	+	cis-acting regulatory element involved in light responsiveness	Environment	Light
TrPHT8	TCT-motif	TCTTAC	404	6	+	part of a light responsive element	Environment	Light
TrPHT8	GA-motif	ATAGATAA	1208	8	+	part of a light responsive element	Environment	Light
TrPHT8	Sp1	GGGCGG	1732	6	-	light responsive element	Environment	Light
TrPHT8	Sp1	GGGCGG	1776	6	+	light responsive element	Environment	Light
TrPHT8	ATCT-motif	AATCTAATCC	125	9	+	part of a conserved DNA module involved in light responsiveness	Environment	Light
TrPHT8	LTR	CCGAAA	273	6	+	cis-acting element involved in low-temperature responsiveness	Environment	Low-temperature
TrPHT8	TC-rich repeats	ATTCTCTAAC	1029	9	+	cis-acting element involved in defense and stress responsiveness	Environment	Mixed stress
TrPHT8	CGTCA-motif	CGTCA	738	5	+	cis-acting regulatory element involved in the MeJA-responsiveness	Phytohormone	MeJA
TrPHT8	CGTCA-motif	CGTCA	954	5	+	cis-acting regulatory element involved in the MeJA-responsiveness	Phytohormone	MeJA
TrPHT8	CGTCA-motif	CGTCA	1854	5	-	cis-acting regulatory element involved in the MeJA-responsiveness	Phytohormone	MeJA
TrPHT8	CGTCA-motif	CGTCA	1936	5	-	cis-acting regulatory element involved in the MeJA-responsiveness	Phytohormone	MeJA
TrPHT8	TGACG-motif	TGACG	738	5	-	cis-acting regulatory element involved in the MeJA-responsiveness	Phytohormone	MeJA
TrPHT8	TGACG-motif	TGACG	954	5	-	cis-acting regulatory element involved in the MeJA-responsiveness	Phytohormone	MeJA
TrPHT8	TGACG-motif	TGACG	1854	5	+	cis-acting regulatory element involved in the MeJA-responsiveness	Phytohormone	MeJA
TrPHT8	TGACG-motif	TGACG	1936	5	+	cis-acting regulatory element involved in the MeJA-responsiveness	Phytohormone	MeJA
TrPHT8	TCA-element	CCATCTTTTT	439	9	-	cis-acting element involved in salicylic acid responsiveness	Phytohormone	Salicylic acid
TrPHT8	MBS	CAACTG	1330	6	-	MYB binding site involved in drought-inducibility	TF	MYB Binding Site
TrPHT8	GCN4_motif	TGAGTCA	519	7	+	cis-regulatory element involved in endosperm expression	Tissue	Endosperm
TrPHT8	CAT-box	GCCACT	389	6	+	cis-acting regulatory element related to meristem expression	Tissue	Meristem
TrPHT9	ARE	AAACCA	738	6	-	cis-acting regulatory element essential for the anaerobic induction	Environment	Anaerobic
TrPHT9	ATCT-motif	AATCTAATCC	799	9	-	part of a conserved DNA module involved in light responsiveness	Environment	Light
TrPHT9	ATCT-motif	AATCTAATCC	804	9	-	part of a conserved DNA module involved in light responsiveness	Environment	Light
TrPHT9	ATCT-motif	AATCTAATCC	912	9	-	part of a conserved DNA module involved in light responsiveness	Environment	Light
TrPHT9	TCT-motif	TCTTAC	1784	6	+	part of a light responsive element	Environment	Light
TrPHT9	TCT-motif	TCTTAC	1899	6	+	part of a light responsive element	Environment	Light
TrPHT9	G-Box	CACGTT	1154	6	-	cis-acting regulatory element involved in light responsiveness	Environment	Light
TrPHT9	I-box	GTATAAGGCC	106	9	-	part of a light responsive element	Environment	Light
TrPHT9	GT1-motif	GGTTAA	1431	6	+	light responsive element	Environment	Light
TrPHT9	G-box	CACGAC	421	6	+	cis-acting regulatory element involved in light responsiveness	Environment	Light
TrPHT9	G-box	TACGTG	962	6	-	cis-acting regulatory element involved in light responsiveness	Environment	Light
TrPHT9	G-box	CACGAC	1047	6	+	cis-acting regulatory element involved in light responsiveness	Environment	Light
TrPHT9	G-box	CACGAC	1052	6	+	cis-acting regulatory element involved in light responsiveness	Environment	Light
TrPHT9	G-box	TACGTG	1331	6	-	cis-acting regulatory element involved in light responsiveness	Environment	Light
TrPHT9	ABRE	ACGTG	962	5	-	cis-acting element involved in the abscisic acid responsiveness	Phytohormone	Abscisic acid
TrPHT9	ABRE	ACGTG	1155	5	+	cis-acting element involved in the abscisic acid responsiveness	Phytohormone	Abscisic acid
TrPHT9	ABRE	ACGTG	1331	5	-	cis-acting element involved in the abscisic acid responsiveness	Phytohormone	Abscisic acid
TrPHT9	ABRE	AACCCGG	1428	7	-	cis-acting element involved in the abscisic acid responsiveness	Phytohormone	Abscisic acid
TrPHT9	TGA-element	AACGAC	1986	6	+	auxin-responsive element	Phytohormone	Auxin
TrPHT9	P-box	CCTTTTG	699	7	-	gibberellin-responsive element	Phytohormone	Gibberellin
TrPHT9	TGACG-motif	TGACG	466	5	+	cis-acting regulatory element involved in the MeJA-responsiveness	Phytohormone	MeJA
TrPHT9	TGACG-motif	TGACG	1179	5	-	cis-acting regulatory element involved in the MeJA-responsiveness	Phytohormone	MeJA
TrPHT9	CGTCA-motif	CGTCA	466	5	-	cis-acting regulatory element involved in the MeJA-responsiveness	Phytohormone	MeJA
TrPHT9	CGTCA-motif	CGTCA	1179	5	+	cis-acting regulatory element involved in the MeJA-responsiveness	Phytohormone	MeJA
TrPHT9	TCA-element	CCATCTTTTT	1342	9	-	cis-acting element involved in salicylic acid responsiveness	Phytohormone	Salicylic acid
TrPHT9	MBS	CAACTG	545	6	-	MYB binding site involved in drought-inducibility	TF	MYB Binding Site
TrPHT9	GCN4_motif	TGAGTCA	1836	7	-	cis-regulatory element involved in endosperm expression	Tissue	Endosperm
TrPHT9	CAT-box	GCCACT	436	6	-	cis-acting regulatory element related to meristem expression	Tissue	Meristem
TrPHT9	CAT-box	GCCACT	1586	6	+	cis-acting regulatory element related to meristem expression	Tissue	Meristem
