# Supplementary material for: Genome-wide identification of Phosphate Transporter gene family in Trichoderma harzianum and expression in response to biotic and abiotic stress
Source: Research Square preprint supplement (doi:10.21203/rs.3.rs-7983806/v1), 2025-11-12
Supplement: Supplementary file 2 [file be354626cb95ed12aab42e7c.docx]

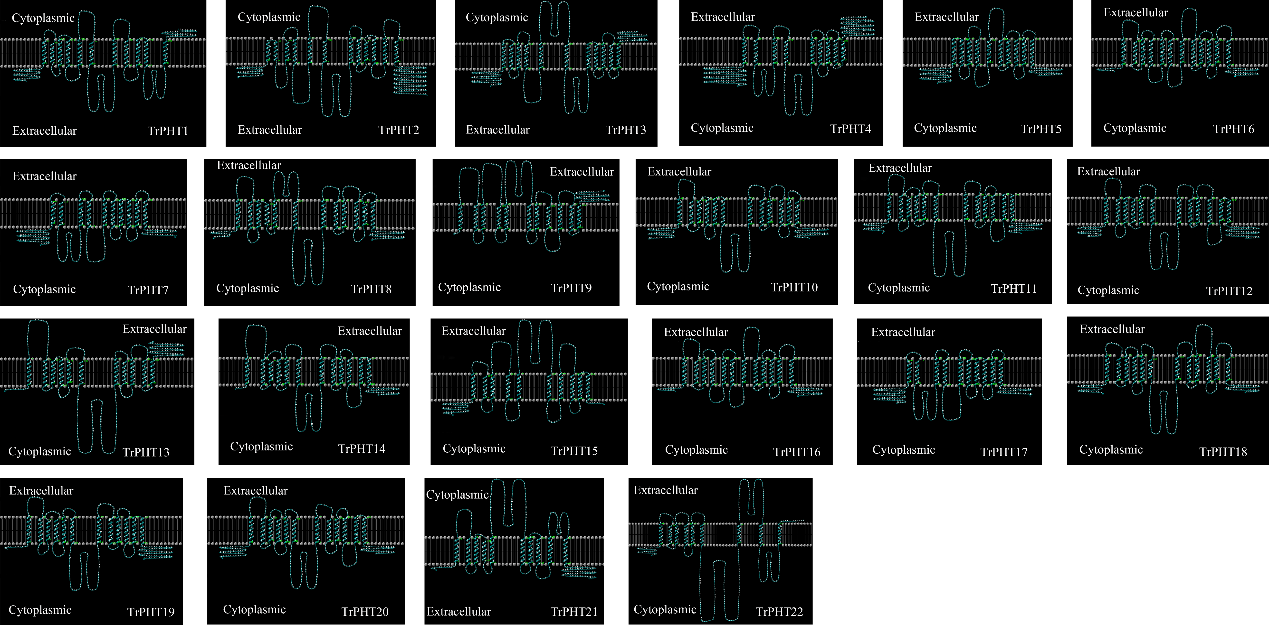


Figure S1. Predicted topology profile of TrPHTs proteins (made and displayed using the TMHMM and Topo2 software).


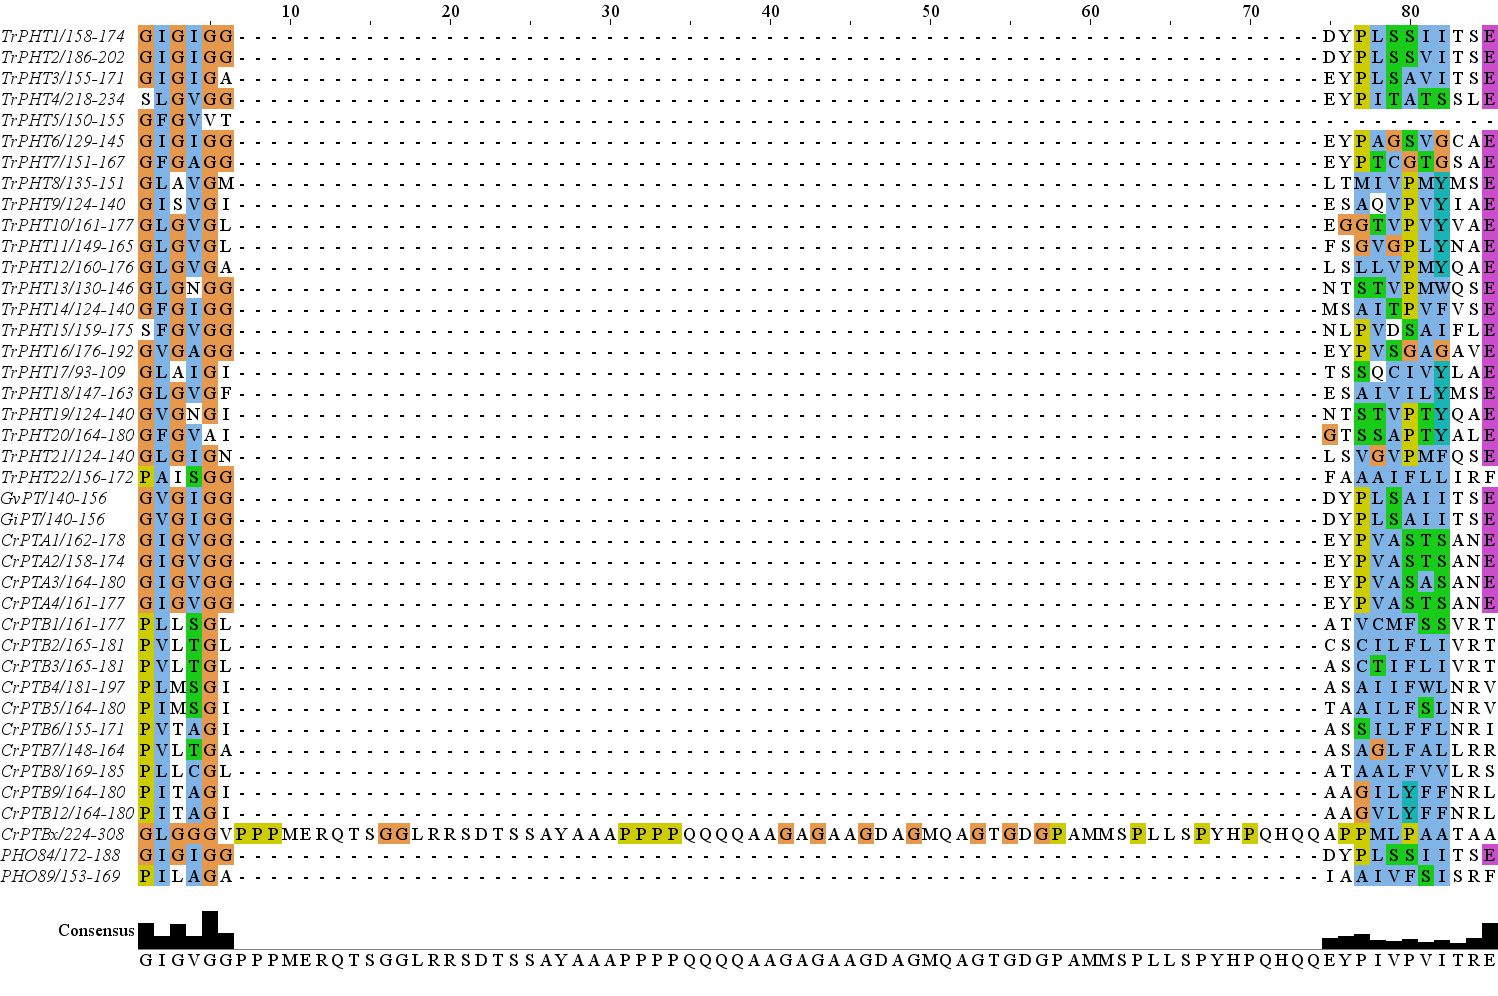


Figure S2. Multiple sequence alignment of signature motif in TrPHTs.


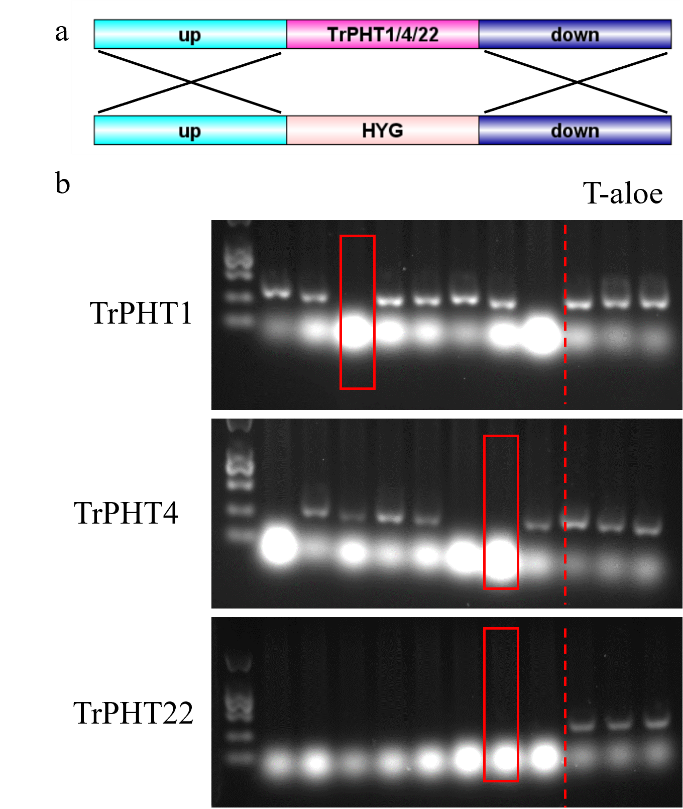


Figure S2. Schematic diagram of *TrPHT1/4/22* gene knockout fragment construction (a) and PCR validation of *TrPHT1/4/22* knockout mutant strains (b).
